**Title:** A population of adult satellite-like cells in *Drosophila* is maintained through a switch in RNA-isoforms

**Authors:** Hadi Boukhatmi and Sarah Bray\*

Department of Physiology Development and Neuroscience,  
University of Cambridge  
Downing Street  
Cambridge, CB2 3DY, UK

\*corresponding author: [sjb32@cam.ac.uk](mailto:sjb32@cam.ac.uk)

## Summary

Adult stem cells are important for tissue maintenance and repair. One key question is how such cells are specified and then protected from differentiation for a prolonged period. Investigating the maintenance of *Drosophila* muscle progenitors (MPs) we demonstrate that it involves a switch in *zfh1/ZEB1* RNA-isoforms. Differentiation into functional muscles is accompanied by expression of *miR-8/miR-200*, which targets the major *zfh1-long* RNA isoform and decreases Zfh1 protein. Through activity of the Notch pathway, a subset of MPs produce an alternate *zfh1-short* isoform, which lacks the *miR-8* seed site. Zfh1 protein is thus maintained in these cells, enabling them to escape differentiation and persist as MPs in the adult. There, like mammalian satellite cells, they contribute to muscle homeostasis. Such preferential regulation of a specific RNA isoform, with differential sensitivity to miRs, is a powerful mechanism for maintaining a population of poised progenitors and may be of widespread significance.

## 1 INTRODUCTION

2 Growth and regeneration of adult tissues depends on stem cells, which remain  
3 undifferentiated while retaining the potential to generate differentiated progeny. For  
4 example, muscle satellite cells (SCs) are a self-renewing population that provides the  
5 myogenic cells responsible for postnatal muscle growth and muscle repair (Chang and  
6 Rudnicki, 2014). One key question is how tissue specific stem cells, such as satellite cells,  
7 are able to escape from differentiation and remain undifferentiated during development, to  
8 retain their stem cell programme though-out the lifetime of the animal.

9 It has been argued that the progenitors of *Drosophila* adult muscles share similarities with  
10 satellite cells and thus provide a valuable model to investigate mechanisms that maintain  
11 stem cell capabilities (Aradhya, et al., 2015; Figeac, et al., 2007). After their specification  
12 during embryogenesis, these muscle progenitors (MPs) remain undifferentiated throughout  
13 larval life before differentiating during pupal stages. For example, one population of MPs is  
14 associated with the wing imaginal disc, which acts as a transient niche, and will ultimately  
15 contribute to the adult flight muscles. These MPs initially divide symmetrically to amplify  
16 the population. They then enter an asymmetric division mode in which they self-renew and  
17 generate large numbers of myoblasts that go on to form the adult muscles (Gunage, et al.,  
18 2014). In common with vertebrates, activity of Notch pathway is important to maintain the  
19 MPs in an undifferentiated state (Gunage, et al., 2014; Mourikis and Tajbakhsh, 2014;  
20 Mourikis, et al., 2012; Bernard, et al., 2010). To subsequently trigger the muscle  
21 differentiation program, levels of Myocyte Enhancer factor 2 (Mef2) are increased and  
22 Notch signalling is terminated (Elgar, et al., 2008; Bernard, et al., 2006). Until now it was  
23 thought that all MPs followed the same fate, differentiating into functional muscles.  
24 However, it now appears that a subset persist into adulthood forming a population  
25 satellite-like cells ((Chaturvedi, et al., 2017) and see below). This implies a mechanism  
26 that enables these cells to escape from differentiation, so that they retain their progenitor-  
27 cell properties.

28 The *Drosophila* homologue of ZEB1/ZEB2, ZFH1 (zinc-finger homeodomain 1), is a  
29 candidate for regulating the MPs because this family of transcription factors is known to  
30 repress Mef2, to counteract the myogenic programme (Postigo and Dean, 1999; Postigo,  
31 et al., 1999). Furthermore, *zfh1* is expressed in the MPs when they are specified in the  
32 embryo and was shown to be up-regulated by Notch activity in an MP-like cell line (DmD8)

33 (Figeac, et al., 2010; Krejci, et al., 2009). Furthermore, an important regulatory link has  
34 been established whereby microRNAs (miRs) are responsible for down-regulating  
35 ZEB/Zfh1 protein expression to promote differentiation or prevent metastasis in certain  
36 contexts (Zaravinos, 2015; Vandewalle, et al., 2009). For example, the miR-200 family is  
37 significantly up-regulated during type II cell differentiation in fetal lungs, where it  
38 antagonizes ZEB1 (Benlhabib, et al., 2015). Likewise, *miR-8*, a *miR-200* relative,  
39 promotes timely terminal differentiation in progeny of *Drosophila* intestinal stem cells by  
40 antagonizing *zfh1* and *escargot* (Antonello, et al., 2015). Conversely, down-regulation of  
41 *miR-200* drives epithelial mesenchymal transition (EMT) to promote metastasis in multiple  
42 epithelial derived tumours (Korpala, et al., 2008; Park, et al., 2008). Such observations  
43 have led to the proposal that the ZEB/miR-200 regulatory loop may be important in the  
44 maintenance of stemness, although examples are primarily limited to cancer contexts and  
45 others argue that the primary role is in regulating EMT (Antonello, et al., 2015; Brabletz  
46 and Brabletz, 2010). The MPs are thus an interesting system to investigate whether this  
47 regulatory loop is a gatekeeper for the stem cell commitment to differentiation.

48 To investigate the concept that ZEB1/Zfh1 could be important in sustaining progenitor-type  
49 status, we examined the role and regulation of *zfh1* in *Drosophila* MPs/SCs. Our results  
50 show that *zfh1* plays a central role in the maintenance of undifferentiated MPs and,  
51 importantly, that its expression is sustained in a population of progenitors that persist in  
52 adults (pMPs). Specifically these pMPs express an alternate short RNA isoform of *zfh1*  
53 that cannot be targeted by *miR-8*. In contrast, the majority of larval precursors express a  
54 long isoform of *zfh1*, which is subject to regulation by *miR-8* so that Zfh-1 protein levels are  
55 suppressed to enable differentiation of myocytes. Expression of alternate *zfh1-short*  
56 isoform is thus a critical part of the regulatory switch to maintain a pool of progenitor  
57 “satellite-like” cells in the adult. This type of regulatory logic, utilizing RNA isoforms with  
58 differential sensitivity to miRs, may be of widespread relevance for adult stem cell  
59 maintenance in other tissues.

60

## 61 RESULTS

62

### 63 **Zfh1 is required for maintenance of muscle progenitors**

64 As *zfh1* was previously shown to antagonize myogenesis it was a plausible candidate to  
65 maintain the muscle progenitor cells in *Drosophila* and prevent their differentiation. We  
66 therefore examined its expression in the muscle progenitors (MPs) associated with the  
67 wing disc. Zfh1 was clearly present throughout the large group of MPs, which can be  
68 distinguished by the expression of Cut (Ct) (Figure 1A-A''). At early stages Zfh1 is  
69 uniformly expressed throughout the MPs (Figure supplement 1) but at later stages the  
70 levels become reduced in the cells with high Cut expression (Figure 1 A''). These cells  
71 give rise to the direct flight muscles (DFMs), whereas the remaining MPs, where Zfh1  
72 expression is high, give rise to the indirect flight muscles (IFMs) (Figure 1 A''; (Sudarsan,  
73 et al., 2001)). Zfh1 expression in MPs is therefore regulated in a manner that correlates  
74 with different differentiation programmes.

75 To determine whether Zfh1 is required in the MPs to antagonize myogenic differentiation  
76 we tested the consequences from expressing a hairpin RNA to target/silence *zfh1*  
77 *specifically* in MPs (using *1151-Gal4* as a driver). Tropomyosin (Tm), a protein normally  
78 expressed in differentiated muscles, was clearly detectable when *zfh1*-was down-  
79 regulated (Figure 1B-C). A similar result was obtained using a Myosin Heavy Chain (MHC)  
80 reporter, which revealed that small muscle fibers formed precociously in ~ 20% of *zfh-1*  
81 depleted wing discs (n=4/20 wing discs; Figure supplement 1). Consistent with the  
82 premature expression of muscle differentiation markers,  $\beta$ -3Tubulin staining showed that  
83 decreased *zfh1* led to abnormal MP cell morphology (Figure 1B'-C'). These results  
84 demonstrate that reduced *zfh1* expression causes MPs to initiate the muscle differentiation  
85 program indicating that *zfh1* is required to prevent MP differentiation.

86 Lineage tracing experiments suggest that a subset of wing disc MPs have characteristics  
87 of muscle stem cells and remain undifferentiated even in adult *Drosophila* (Chaturvedi, et  
88 al., 2017; Gunage, et al., 2014). Since Zfh-1 is necessary to prevent differentiation in MPs,  
89 we reasoned that its expression might be sustained in these persistent muscle progenitors  
90 (pMPs). Indeed, some individual cells, closely associated with adult IFM muscle fibers,  
91 had high levels of Zfh1 expression whereas the differentiated muscle nuclei exhibited no  
92 detectable expression (Figure 1D-D'). To better characterise these Zfh1-positive adult cells,

93 we expressed a membrane-tagged GFP (*UAS-Src::GFP*) under the control of a specific  
94 muscle driver *mef2-Gal4* (*mef2>GFP*). This confirmed that *Zfh1* was expressed in  
95 *mef2>GFP* expressing cells, indicating they were myogenic, and that these cells were  
96 closely embedded in the muscle lamina (Figure 1E-E’’). These cells therefore have  
97 characteristics of persistent muscle progenitors and likely correspond to the so-called adult  
98 satellite cells recently identified by others (Figure 1D and E). Although many of the *Zfh1*  
99 expressing cells were clearly co-expressing *Mef2>GFP*, *Zfh1* was also detected in another  
100 population that lacked *Mef2* expression. Often clustered, these cells were co-labelled with  
101 a plasmatocyte marker *P1/Nimrod* indicating that they are phagocytic immune cells (Figure  
102 supplement 2).

103 The results demonstrate that *Zfh1* is expressed in MPs, where it is required for their  
104 maintenance, and that its expression continues into adult-hood in a small subset of  
105 myogenic cells. If, as these data suggest, *Zfh1* is important for sustaining a population of  
106 a persistent adult progenitors, there must be a mechanism that maintains *Zfh1* expression  
107 in these cells while the remainder differentiate into functional flight muscles.

108

### 109 ***zfh1* enhancers conferring expression in MPs**

110 To investigate whether the maintenance of *Zfh1* expression in larval and adult MPs could  
111 be attributed to distinct enhancers, we screened *enhancer-Gal4* collections (Jenett, et al.,  
112 2012; Jory, et al., 2012; Manning, et al., 2012) to identify *zfh1* enhancers that were active  
113 in larval MPs. From the fifteen enhancers across the *zfh1* genomic locus that were tested,  
114 (Figure 2 and Figure supplement 3 A) three directed GFP expression in the *Cut* expressing  
115 MPs (Figure 2B-D). These all correlated with regions bound by the myogenic factor *Twist*  
116 in muscle progenitor related cells (Figure supplement 3 A and (Bernard, et al., 2010)).  
117 Enhancer 1 (*Enh1*; VT050105) conferred weak expression in scattered progenitors (Figure  
118 2B). Enhancer 2 (*Enh2*; VT050115) was uniformly active in all MPs and also showed  
119 ectopic expression in some non-*Cut* expressing cells (Figure 2C). Finally, Enhancer 3  
120 (*Enh3*; GMR35H09) conferred expression in several MPs with highest levels in a subset  
121 located in the posterior (Figure 2D). *Enh3* encompasses a region that was previously  
122 shown to be bound by *Su(H)* in muscle progenitor related cells, hence may be regulated  
123 by Notch activity (Figure supplement 3A; (Bernard, et al., 2010; Krejci, et al., 2009). These  
124 results demonstrate that several enhancers contribute to *zfh1* expression in the MPs.

125 To determine which enhancer(s) are also capable of conferring *zfh-1* expression in adult  
126 pMPs we assessed their activity in adult muscle preparations. Only Enh3 exhibited any  
127 activity in these cells (Figure 2E), where it recapitulated well Zfh1 protein expression  
128 (Figure 2 E-E’). Thus, Enh3-GFP was clearly detectable in scattered cells, which were  
129 closely apposed to the muscle fibers and contained low levels of Mef-2 (Figure 2E’), and  
130 was not expressed in the differentiated muscle nuclei (Figure 2). These results suggest  
131 that Enh3 is responsible for maintaining *zfh1* transcription in the adult pMPs.

132 If Enh3 is indeed necessary for expression of *zfh1* in MPs and pMPs, its removal should  
133 curtail *zfh1* expression in those cells. To test this, Enh3 was deleted by Crispr/Cas9  
134 genome editing ( $\Delta$ Enh3; see material and methods).  $\Delta$ Enh3 homozygous flies survived  
135 until early pupal stages allowing us to analyze the phenotype at larval stages. As predicted,  
136  $\Delta$ Enh3 MPs exhibited greatly reduced Zfh1 protein expression (Figure 3F-H) that  
137 correlated with decreased *zfh1* mRNA levels (Figure supplement 3B). Although striking,  
138 the effects of  $\Delta$ Enh3 did not phenocopy those of depleting *zfh1* using RNAi, as no  
139 premature up-regulation of muscle differentiation markers (MHC, Tm) occurred in  $\Delta$ Enh3  
140 discs (data not shown). This is likely due to residual *zfh1* mRNA/protein (Figure 2G),  
141 brought about by the activity of other *zfh1* enhancers (e.g. Enh1 and Enh2, Figure 2B-C).  
142 Nevertheless, it is evident that Enh3 has a key role in directing *zfh1* expression in MPs.

143

#### 144 **Adult Zfh1+ve MP cells contribute to flight muscles**

145 By recapitulating Zfh1 in adult MPs, Enh3 provides a powerful tool to investigate whether  
146 the persistent MPs are analogous to muscle satellite cells, which are able to divide and  
147 produce committed post-mitotic myogenic cells that participate in muscle growth and  
148 regeneration. To address this we used a genetic G-trace method, which involves two UAS  
149 reporters, an RFP reporter that directly monitors the current activity of the Gal4 and a GFP  
150 reporter that records the history of its expression to reveal the lineage (Evans, et al., 2009).  
151 When *Enh3-Gal4* was combined with the G-trace cassette RFP expression was present in  
152 the muscle-associated pMPs, which have low Mef2 expression (Figure 2I-I’). Strikingly,  
153 most of the muscle nuclei expressed GFP (Figure 2I’-I’’) suggesting that they are derived  
154 from ancestral Enh3 expressing cells (Figure 2I’). Furthermore, close examination of the  
155 Enh3 driven RFP expression showed that it often persisted in two nearby muscle nuclei.  
156 This suggests that these nuclei are recent progeny of Enh3 expressing cells, indicating  
157 that these cells have kept the ability to divide that is characteristic of a satellite-like stem

158 cell population (Figure 2). To further substantiate this conclusion, we verified that adult  
159 Zfh1+ve cells were actively dividing cells, using the mitotic marker phosphohistone-3  
160 (PH3) staining. Many examples of Zfh1+ve cells co-stained for PH3 (Figure 2J-J'')  
161 indicating that these adult cells are dividing cells. Taken together the results argue that the  
162 adult Zfh1+ve cells resemble mammalian satellite cells, retaining the capacity to divide and  
163 provide progeny that maintain the adult flight muscles.

#### 164 **Notch directly regulates *zfh1* expression in muscle progenitors and adults pMPs**

165 As mentioned above, *zfh1* is regulated by Notch activity in *Drosophila* DmD8, MP-related,  
166 cells (Krejci, et al., 2009), where Enh3 was bound by Su(H) (Figure 2A and Figure  
167 supplement 3). Furthermore, phenotypes from depletion of *zfh1* in MPs, were reminiscent  
168 of those elicited by loss of Notch (N) signaling (Figure 1 and (Krejci, et al., 2009)). Notch  
169 activity is therefore a candidate to maintain Zfh1 expression in the adult pMPs, thereby  
170 preventing their premature differentiation. As a first step to test whether Notch activity  
171 contributes to *zfh1* expression, we depleted *Notch* in muscle progenitors by driving Notch  
172 RNAi expression with *1151-Gal4* (Figure 3A-B and C). Under these conditions, Zfh1  
173 expression was significantly reduced consistent with Notch being required for *zfh1*  
174 expression in MPs. Second, the consequences of perturbing Notch regulation by mutating  
175 the Su(H) binding motifs in Enh3 were analyzed. Two potential Su(H) binding sites are  
176 present in Enh3 and both are highly conserved across species (Figure 2A). Mutation of  
177 both motifs, *Enh3[mut]*, resulted in a dramatic decrease of the enhancer activity in the MPs  
178 (Figure 3D-E and F). This supports the hypothesis that Notch directly controls *zfh1*  
179 expression in MPs by regulating activity of Enh3.

180 Since Enh3 activity persists in the adult MPs (Figure 2), we next analyzed whether  
181 mutating the Su(H) motifs impacted expression in these adult pMPs. Similar to larval  
182 stage MPs, *Enh3[mut]* had lost the ability to direct expression of GFP in the adult pMPs  
183 (Figure 3G-H). Thus, the Su(H) motifs are essential for Enh3 to be active in the adult pMPs.  
184 These data support the model that persistence of Zfh1 expression in adult MPs is likely  
185 due to Notch input, acting throughout Enh3.

186 The results imply that Notch should be expressed and active in the adult pMPs. To  
187 investigate this, we made use of a *Notch[NRE]-GFP* reporter line. *Notch[NRE]* is an  
188 enhancer from the *Notch* gene, and itself regulated by Notch activity, such that it is a read  
189 out both of Notch expression and of Notch activity (Simon, et al., 2014). Strikingly,  
190 *Notch[NRE]-GFP* reporter is consistently expressed in the Zfh1+ve adult pMPs, confirming



191 that Notch is active in these cells (Figure 3I) but not in the differentiated muscles. It is also  
192 active in some surrounding non-muscles cells/tissues (Figure 3I). Together, the results  
193 show that *zfh1* expression in the adult pMPs requires Notch activity acting through Enh3.

#### 194 ***zfh1* is silenced by the conserved microRNA *miR-8/miR-200* in MPs**

195 Although transcriptional control of *zfh1* by Notch explains one aspect of its regulation,  
196 since all larval MPs express Zfh1 it remained unclear how a subset maintain this  
197 expression and escape from differentiation to give rise to the adult pMPs. A candidate to  
198 confer an additional level of regulation on *zfh1* expression is *miR-8/miR-200*, which is  
199 important for silencing *zfh1* (and its mammalian homologue ZEB1) in several contexts. The  
200 regulatory loop between *miR-8/miR-200* and *zfh1/ZEB* has been extensively studied in  
201 both *Drosophila* and vertebrates and is mediated by a *miR-8/miR-200* seed site located in  
202 the 3' untranslated region (3'UTR) (Antonello, et al., 2015; Vallejo, et al., 2011; Brabletz  
203 and Brabletz, 2010).

204 To determine whether *miR-8* could down-regulate *zfh1* in muscle progenitors to promote  
205 their differentiation into muscles, we first examined the spatiotemporal expression pattern  
206 of *miR-8* at larval and adult stages (Figure 4) using *miR-8-Gal4*, whose activity reflects the  
207 expression of the endogenous *miR-8* promoter (Karres, et al., 2007). *miR-8-Gal4* was  
208 combined with a membrane GFP (for Progenitors, Figure 4A) or a nuclear GFP (for Adult  
209 muscles nuclei, Figure 4D) to visualize its expression. At larval stages, *miR-8* expression  
210 was inversely correlated with Zfh1 levels. Thus in most of the MPs, where Zfh1  
211 expression was high, there was little or no expression from *miR-8-Gal4* (Figure 4 B-B' and  
212 Figure 1A). Conversely, in the subset of MPs where Zfh1 is low (high Ct expressing DFM  
213 precursors) there were correspondingly higher levels of *miR-8-Gal4*, although the absolute  
214 levels were low compared to some of the surrounding tissues; Figure 4C-C' and Figure 1  
215 A). In contrast, adult muscles had uniform and high levels of *miR-8-Gal4*; all of the  
216 differentiated muscle nuclei exhibited nuclear GFP (Figure 4D-D'). Strikingly, at the same  
217 time, *miR-8-Gal4* expression was absent from the Zfh1+ve adult pMPs (Figure 4D-D').  
218 These data show that, during muscle formation, *miR-8* and Zfh1 are expressed in a  
219 mutually exclusive manner; supporting the model that *miR-8* negatively regulates *zfh1*.

220 To further address this regulation, we tested the impact of *miR-8* overexpression on Zfh1  
221 protein levels in MPs at larval stage (Figure 4). Zfh1 protein levels were significantly  
222 diminished under these conditions, in agreement with *miR-8* regulating *zfh1* post-  
223 transcriptionally (Figure 4E-G). Although this manipulation was not sufficient to cause

224 premature up-regulation of muscle differentiation markers, the few surviving adults all  
225 displayed a held-out wing phenotype, which is often associated with defective flight  
226 muscles (Vigoreaux, 2001).

227 Next we assessed whether *miR-8* activity/expression changes in response to Mef2 levels,  
228 a critical determinant of muscle differentiation, using a *miR-8* sensor (containing two *miR-8*  
229 binding sites in its 3'UTR (Kennell, et al., 2012). Expression of the *miR-8* sensor was  
230 specifically decreased when Mef2 was overexpressed in MPs, suggesting that *miR-8*  
231 expression responds to high level of Mef2 (Figure supplement 4). Together, these data  
232 argue that *miR-8* up-regulation during muscle differentiation blocks Zfh1 production to  
233 allow MPs to differentiate.

234

### 235 **An alternate short *zfh1* isoform is transcribed in adult MPs**

236 To retain their undifferentiated state, the adult pMPs must evade *miR-8* regulation and  
237 maintain Zfh1 expression. The *zfh1* gene gives rise to three different mRNA isoforms; two  
238 long *zfh1* isoforms (*zfh1-long*; *zfh1-RE/RB*) and one short *zfh1* isoform (*zfh1-short*; *zfh1-*  
239 *RA*) (Figure 5A). Although long *zfh1* isoforms have two additional N-terminal zinc fingers,  
240 all three RNA-isoforms produce proteins containing the core zinc finger and  
241 homeodomains needed for Zfh1 DNA-binding activity (Figure supplement 5; (Postigo, et  
242 al., 1999)). Importantly, *zfh1-short* isoform has a shorter 3'UTR, which lacks the target site  
243 for *miR-8* (Figure 5A; (Antonello, et al., 2015), as well as differing in its transcription start  
244 site (TSS) (Figure 5A; Flybase FBgn0004606). As *zfh1-short* is predicted to escape *miR-8*  
245 mediated down-regulation, its expression will enable cells to retain high level of Zfh1  
246 protein, explaining how the adult pMPs can escape differentiation. To test this prediction,  
247 we designed fluorescent probes specific for the *zfh1-long* and *zfh1-short* isoforms and  
248 used them for in situ hybridization (FISH) at larval and adult stages (Figure 5A). In the  
249 larval stage (L3), *zfh1-long isoforms were* present at uniformly high levels in the MPs  
250 (Figure 5B-B'") whereas *zfh1-short* was expressed at much lower levels and only detected  
251 in a few MPs in each disc (Figure 5C-C'").

252 We then analyzed *zfh1* isoforms expression in adult muscles, where the adult pMPs were  
253 marked by *Enh3-Gal4>GFP* and low Mef2 expression (Figure 5D-E). In contrast to MPs in  
254 the larva, these adult pMPs expressed high levels of *zfh1-short* and much lower levels of  
255 *zfh1-long* (Figure 5D-E'"). *zfh1-short* was only present in the pMPs whereas dots of *zfh1-*  
256 *long* hybridization were also detected in some differentiated nuclei (with high level of Mef2)

257 (Figure 5). These data indicate that *zfh1-long* isoforms are transcribed in both the  
258 progenitors and in muscle cells where *miR-8* regulation will prevent their translation,  
259 explaining the lack of protein. In contrast, *zfh1-short* is only expressed in a few larval MPs,  
260 and it is then detected at highest levels specifically in the adult pMPs. Since *zfh1-short* is  
261 not susceptible to regulation by *miR-8*, its specific transcription may therefore be  
262 determinant for maintaining high levels of Zfh1 in a subset of progenitors and enable them  
263 to escape differentiation.

264

### 265 ***zfh1* isoform transcription requires Notch activity in adult SCs**

266 As expression of *zfh1-short* (*zfh1-RA*) in the adult MPs (Figure 5E) may be critical for them  
267 to retain their progenitor status, there must be mechanisms that ensure this isoform is  
268 appropriately transcribed. Notch is required for Zfh1 expression in MPs (Figure 3) and  
269 thus may contribute to this regulation. If this is the case, expression of a constitutively  
270 active Notch (Notch $\Delta$ ECD) should up regulate *zfh1-short* transcripts in the MPs at larval  
271 stages when its expression is normally low. In agreement, expression of active Notch in  
272 the progenitors (1151-Gal4>Notch $\Delta$ ECD) significantly increased the proportions of cells  
273 transcribing *zfh1-short* (Figure 6 A-B' and C).

274 To address whether Notch is necessary for *zfh1-short* transcription in the adult pMPs, we  
275 specifically depleted Notch levels after eclosion (using *Enh3-Gal4* in combination with  
276 Gal80<sup>ts</sup> to drive *Notch RNAi*; Figure 6 D-E'). Consistent with expression of *zfh1-short* being  
277 dependent on Notch activity, the levels of *zfh1-short* were significantly reduced in the adult  
278 pMPs when Notch was down-regulated after eclosion (Figure 6 D-E and G). Conversely,  
279 expression of *zfh1-long* was unaffected (Figure supplement 6). Notably, Mef2 accumulated  
280 to high levels in the adult pMPs under these conditions, suggesting that Notch activity  
281 helps prevent their differentiation (Figure 6 D' and E'), most likely through its regulation of  
282 *zfh1-short*.

283 To investigate whether *zfh1* expression in adult MPs is required to prevent them  
284 differentiating, its expression was similarly downregulated in the pMPs, at 48 hours after  
285 eclosion. Targeted *zfh1* down-regulation in adults resulted in high levels of Mef2 being  
286 present in the adult MPs, suggesting that they had entered into the differentiation  
287 programme (Figure 6F-F'). Such forced differentiation of MPs would deplete the progenitor  
288 population and so should compromise muscle maintenance and repair. We therefore  
289 monitored the consequences of prolonged *zfh1* depletion on adult flies, assessing their

290 phenotypes at ten days. Approximately 30% had a “held out wing” posture (n= 9/27)  
291 (Figure 7A-B), a phenotype often associated with flight muscle defects (Vigoreaux, 2001).  
292 The number of nuclei per muscle (DLM4) was also significantly reduced in the aged adults  
293 when *zfh1* was specifically depleted in the pMPs (Figure 7D-E). As no “held out wing”  
294 phenotype or muscle defects were observed in adult flies within 24 hours of knock-down,  
295 the phenotypes at 10 days are due a defect in the homeostasis of the adult flight muscles,  
296 consistent with *Zfh1*+ve cells contributing to their maintenance in a manner similar to the  
297 mammalian satellite cells.

298

299 **DISCUSSION**

300

301 A key property of adult stem cells is their ability to remain in a quiescent state for a  
302 prolonged period of time (Li and Clevers, 2010). Investigating the maintenance of  
303 *Drosophila* MPs we have uncovered an important new regulatory logic, in which a switch in  
304 RNA isoforms enables a sub-population of cells to escape miRNA regulation and so avoid  
305 the differentiation programme. At the same time, analyzing expression of a pivotal player  
306 in this regulatory loop, *zfh1*, has revealed a population of persistent progenitors associated  
307 with adult muscles in *Drosophila*, that appear analogous to mammalian satellite cells  
308 (Figure 7F).

309 ***Zfh1 marks a population of satellite-like cells in adult Drosophila***

310 Until now, the fly has been thought to lack a persistent muscle stem cell population,  
311 leading to speculation about how its muscles could withstand the wear and tear of its  
312 active lifestyle. By analyzing the expression and function of Zfh-1, we identified a  
313 population of muscle-associated cells in the adult that retain progenitor-like properties,  
314 marked by Zfh-1 expression. Expression in the persistent adult “satellite-like” cells is  
315 dependent on one specific Zfh1 enhancer, which is directly regulated by Notch. Activity of  
316 Notch is important for maintaining Zfh1 expression and hence is required to sustain the  
317 progenitor status of these cells, similar to the situation in mammalian satellite cells, which  
318 require Notch activity for their maintenance (Mourikis and Tajbakhsh, 2014; Bjornson, et  
319 al., 2012).

320 Using lineage-tracing method we showed that adult Zfh1+ve cells, in normal conditions,  
321 provide new myoblasts to the fibers. Furthermore, conditional down regulation of *zfh1* led  
322 adult pMPs to enter differentiation and resulted in flight defects, evident by a held out wing  
323 posture. These results demonstrate that Zfh-1 is necessary to maintain these progenitors  
324 and that, similar to vertebrate satellite cells; the Zfh1+ve progenitor cells contribute to the  
325 adult muscles homeostasis. Thus the retention of a pool of progenitor cells may be critical  
326 to maintain the physiological function of all muscles in all organism types, as also  
327 highlighted by their identification in another arthropod *Parahyle* (Alwes, et al., 2016;  
328 Konstantinides and Averof, 2014). *Drosophila* notably differs because their satellite-like  
329 cells do not express the Pax3/Pax7 homologue (*gooseberry*; data not shown), considered  
330 a canonical marker in mammals and some other organisms (Chang and Rudnicki, 2014).  
331 Instead, Zfh1 appears to fulfill an analogous function and it will be interesting to discover

332 how widespread this alternate Zfh1 pathway is for precursor maintenance. Notably, the  
333 loss of ZEB1 in mice accelerates the temporal expression muscle differentiation genes (eg.  
334 MHC) suggesting that there is indeed an evolutionary conserved function of Zfh1/ZEB in  
335 regulating the muscle differentiation process (Siles, et al., 2013). This lends further  
336 credence to the model that Zfh1 could have a fundamental role in preventing differentiation  
337 that may be harnessed in multiple contexts.

### 338 ***Switching 3' UTR to protect progenitors from differentiation***

339 Another key feature of Zfh-1 regulation that is conserved between mammals and flies is its  
340 sensitivity to the miR-200/miR-8 family of miRNAs (Antonello, et al., 2015; Brabletz and  
341 Brabletz, 2010). This has major significance in many cancers, where loss of miR-200  
342 results in elevated levels of ZEB1 promoting the expansion of cancer stem cells, and has  
343 led to a widely accepted model in which the downregulation of Zfh1 family is necessary to  
344 curb stem-ness (Brabletz and Brabletz, 2010). This fits with our observations, as we find  
345 that *miR-8* is upregulated during differentiation of the MPs and suppresses Zfh1 protein  
346 expression. Critically however, only some RNA isoforms, *zfh1-long*, contain seed sites  
347 necessary for *miR-8* regulation (Antonello, et al., 2015). The alternate, *zfh1-short*, isoform  
348 has a truncated 3'UTR that lacks the *miR-8* recognition sequences and will thus be  
349 insensitive to *miR-8* regulation. Significantly, this *zfh1-short* isoform is specifically  
350 expressed in MPs that persist into adulthood and hence can protect them from *miR-8*  
351 induced differentiation. Furthermore, it appears that Notch activity strongly promotes *zfh1-*  
352 *short* expression, explaining how this isoform is retained to sustain progenitors into adult-  
353 hood.

354 Our study therefore provides a novel molecular logic explaining the maintenance of  
355 *Drosophila* satellite-like cells. This relies on the expression of *zfh1-short*, which, by being  
356 insensitive to *miR-8* regulation, can sustain Zfh1 protein production to protect pMPs from  
357 differentiation (Figure 7F). It also implies that Notch preferentially promotes the expression  
358 of a specific RNA isoform, most likely through the use of an alternate promoter in *zfh1*.  
359 Both of these concepts have widespread implications.

360 Alternate use of 3'UTRs, to escape miR regulation, is potentially an important mechanism  
361 to tune developmental decisions. Some tissues have a global tendency to favour certain  
362 isoform types, for example, distal polyadenylation sites are preferred in neuronal tissues  
363 (Zhang, et al., 2005). Furthermore, the occurrence of alternate 3'UTR RNA isoforms is  
364 widespread (>50% human genes generate alternate 3'UTR isoforms) and many conserved

365 miR target sites are contained in such alternate 3'UTRs (Sandberg, et al., 2008; Tian, et  
366 al., 2005). Thus, similar isoform switching may underpin many instances of progenitor  
367 regulation and cell fate determination. Indeed an isoform switch appears to underlie  
368 variations in Pax3 expression levels between two different populations of muscle satellite  
369 cells in mice, where the use of alternative polyadenylation sites resulted in transcripts with  
370 shorter 3'UTRs that are resistant to regulation by *miR-206* (Boutet, et al., 2012). The  
371 selection of alternate 3'-UTRs could ensure that protein levels do not fall below a critical  
372 level (Yatsenko, et al., 2014), and in this way prevent differentiation from being triggered.

373 The switch in *zfh1* RNA isoforms is associated with Notch-dependent maintenance of the  
374 persistent adult MPs. Notably, *zfh1-short* is generated from an alternate promoter, as well  
375 as having a truncated 3'UTR, which may be one factor underlying this switch. Studies in  
376 yeasts demonstrate that looping occurs between promoters and polyadenylation sites, and  
377 that specific factors recruited at promoters can influence poly-A site selection (Lamas-  
378 Maceiras, et al., 2016; Tian and Manley, 2013). The levels and speed of transcription also  
379 appear to influence polyA site selection (Proudfoot, 2016; Tian and Manley, 2013; Pinto, et  
380 al., 2011). If Notch mediated activation via *Enh3* favors initiation at the *zfh1-short* promoter,  
381 this could in turn influence the selection of the proximal adenylation site to generate the  
382 truncated *miR-8* insensitive UTR. The concept that signaling can differentially regulate  
383 RNA sub-types has so far been little explored but our results suggest that is potentially of  
384 considerable significance. In future it will be important to investigate the extent that this  
385 mechanism is deployed in other contexts where signaling coordinates cell fate choices and  
386 stem cell maintenance.

387

## 388 **Materials and Methods**

389

390 **Drosophila Genetics.** All *Drosophila melanogaster* stocks were grown on standard  
391 medium at 25°C. The following stains were used: *w*<sup>118</sup> as wild type (wt), *UAS-white-RNAi*  
392 as control for *RNAi* experiments (BL #35573), *UAS-zfh1-RNAi* (VDRC: KK103205 and  
393 GD42856), *Mef2-Gal4* (Ranganayakulu, et al., 1996), *UAS-Mef2* (Cripps, et al., 2004),  
394 *UAS-GTRACE* (BL # 28281), *UAS-Notch-RNAi* (BL #7078), *Notch[NRE]-GFP* (Simon, et  
395 al., 2014), *UAS-NotchΔECD* (Chanet, et al., 2009; Fortini and Artavanis-Tsakonas, 1993;  
396 Rebay, et al., 1993), *miR8-Gal4* (Karres, et al., 2007), *UAS-miR8* (Vallejo, et al., 2011),  
397 *UAS-mCD8::GFP* (BL # 5137), *UAS-GFPnls* (BL # 65402), *UAS-Src::GFP* (Kaltschmidt, et  
398 al., 2000), *MHC-lacZ* (Hess et al., 1989), *1151-Gal4* (Anant, et al., 1998), *miR-8-sensor-*  
399 *EGFP* (Kennell, et al., 2012). *RNAi* experiments were conducted at 29°C and *TubGal80<sup>ts</sup>*  
400 (McGuire, et al., 2003) was used to limit *RNAi* expression to a defined period of time.  
401 Enhancer-Gal4 lines described in Figure 2 and Figure supplement S3 are either from  
402 Janelia FlyLight (<http://flweb.janelia.org>) or Vienna Tiles Library  
403 (<http://stockcenter.vdrc.at/control/main>).

404

405 **Immunohistochemistry and *in situ* hybridization.** Immunofluorescence stainings of  
406 wing discs were performed using standard techniques. Adult muscles were prepared and  
407 stained as described (Hunt and Demontis, 2013). The following primary antibody were  
408 used: Rabbit anti-Zfh1 (1:5000, a gift from Ruth Lehmann, New York, USA), Mouse anti-  
409 Cut (1:20, DSHB), Rabbit anti-β3-Tubulin (1:5000, a gift from Renate Renkawitz-Pohl,  
410 Marburg, Germany), Rat anti-Tropomyosin (1:1000, Abcam, ab50567), Goat anti-GFP  
411 (1:200, Abcam, ab6673), Rabbit anti-Ds-Red (1:25; Clontech, 6324496), Rabbit anti-Mef2  
412 (1:200, a gift from Eileen Furlong, Heidelberg, Germany), Mouse anti-P1 (1:20, a gift from  
413 István Andó, Szeged, Hungary), Mouse anti-PH3 (1:100, Cell Signaling Technology, #9706),  
414 Mouse anti-β-Gal (1:1000, Promega, Z378A), Alexa-conjugated Phalloidin (1:200, Thermo  
415 fisher), Rat anti-Dcad2 (1:200, DSHB). *In situ* experiments were carried out according to  
416 Stellaris-protocols  
417 ([https://www.biosearchtech.com/assets/bti\\_custom\\_stellaris\\_drosophila\\_protocol.pdf](https://www.biosearchtech.com/assets/bti_custom_stellaris_drosophila_protocol.pdf)).  
418 Antibodies were included to the overnight hybridization step (together with the probes).  
419 *zfh1* probes were generated by BioResearch Technologies. The sequence used for *zfh1-*



420 *short* probe span 393bp of the first *zfh1*-RA exon, for *zfh1-long* probe, the sequence of the  
421 third exon (711bp) common to both *zfh1*-RB and *zfh1*-RE was used (see Figure 5).

422 **Construction of reporter lines and mutagenesis.** For Enh3-GFP reporter line, the  
423 genomic region chr3R : 30774595..30778415 (Enh3/GMR35H09) according to Flybase  
424 genome release r6.03 was amplified using *yw* genomic DNA as template. Enh3 fragment  
425 was then cloned into the pGreenRabbit vector (Housden, et al., 2012). For *Enh3[mut]-GFP*  
426 line, two Su(H) binding sites were predicted within Enh3 sequence using Patser (Hertz and  
427 Stormo, 1999) and mutated by PCR based approach with primers overlapping the Su(H)  
428 sites to be mutated with the following sequence modifications : Su(H)1 AGTGGGAA to  
429 AGGTGTGA and Su(H) 2 TTCTCACA to TGTTTGCA. Both constructs were inserted at  
430 position 68A4 on the third chromosome by injection into *nos-phiC31-NLS; attP2* embryos  
431 (Bischof, et al., 2007).

432 **CRISPR/Cas9 genome editing.** CRISPR mediated deletion of Enh3 was performed  
433 according to (Port, et al., 2014) For generating guide RNAs, two protospacers were  
434 selected (sgRNA1 GCATTCCGCAGGTTTAGTCAC and sgRNA2  
435 GCGATAACCCGGCGACCTCC) flanking 5' and 3' Enhancer-3 regions,  
436 (<http://www.flyrnai.org/crispr/>). The protospacers were cloned into the tandem guide RNA  
437 expression vector pCFD4 (Addgene # 49411) ([http://www.crisprflydesign.org/wp-](http://www.crisprflydesign.org/wp-content/uploads/2014/06/Cloning-with-pCFD4.pdf)  
438 [content/uploads/2014/06/Cloning-with-pCFD4.pdf](http://www.crisprflydesign.org/wp-content/uploads/2014/06/Cloning-with-pCFD4.pdf)). For the homology directed repair step,  
439 two homology arms were amplified using *yw* genomic DNA as template with the following  
440 primers (Homology arm1: Fwd. 5' GCGCGAATTCGGGCTAAACGCCAGATAAGCG 3'  
441 Rev. 5' TTCCGCGGCCGCC ACTGGATTCCACGGCTTTTCG 3'– Homology arm 2: Fwd.  
442 5' GGTAGCTCTTCTTA TATAACCCGGCGACCTCCTCG 3' Rev. 5'  
443 GGTAGCTCTTCTGACCGGAC GAAAACTAGCGACC) and cloned into the pDsRed-attP  
444 (Addgene # 51019) vector (<http://flycrispr.molbio.wisc.edu/protocols/pHD-DsRed-attP>).  
445 Both constructs were injected into *nos-Cas9* (BL # 54591) embryos. Flies mutant for  
446 Enhancer 3 were screened for the expression of the Ds-Red in the eyes and confirmed  
447 with sequencing of PCR fragment spanning the deletion.

448 **Microscopy and data analysis.** Samples were imaged on Leica SP2 or TCS SP8  
449 microscopes (CAIC, University of Cambridge) at 20X or 40X magnification and 1024/1024  
450 pixel resolution. Images were processed with Image J and assembled with Adobe  
451 Illustrator. Quantification of fluorescence signal intensities was performed with Image J  
452 software. In each case the n refers to the number of individual specimens analyzed, which  
453 were from two or more independent experiments. For experiments to compare and

454 measure expression levels, samples were prepared and analyzed in parallel, with identical  
455 conditions and the same laser parameters used for image acquisition. For each confocal  
456 stack a Sum slices projections was generated. Signal intensities were obtained by  
457 manually outlining the regions of interest, based on expression of markers, and measuring  
458 the average within each region. The values were then normalized to similar background  
459 measurements for each sample. In Figure 6 the number of transcriptional *zfh1-short* dots  
460 was counted manually with Image J and normalized to the total number of nuclei (Zfh1  
461 staining), which was determined by a Matlab homemade script. Graphs and statistical  
462 analysis were performed with Prism 7 using unpaired t-test. Error bars indicate standard  
463 error of the mean.

464 **Quantitative RT PCR.** 30 Wing Imaginal discs from each genotype were dissected and  
465 RNA isolated using TRIzol (Life technologies). Quantitative PCR were performed as  
466 described (Krejci and Bray, 2007). Values were normalized to the level of *Rpl32*. The  
467 following primers were used. *Rpl32*, Fwd 5'-ATGCTAAGCTGTCGCACAAATG-3' and Rev  
468 5'-GTTTCGATCCGTAACCGATGT-3'. *zfh1* Fwd 5'- GTTCAAGCACCACTCAAGGAG-3'  
469 and Rev 5'- CTTCTTGGAGGTCATGTGGGAGG-3'. (Product common to all three  
470 *zfh1* isoforms).

#### 471 **Acknowledgements**

472  
473 We thank the Bloomington Stock Center, the VDRC Stock Center and the Developmental  
474 Studies Hybridoma Bank for *Drosophila* strains and antibodies. We acknowledge Ruth  
475 Lehmann, Renate Renkawitz-Pohl, Eileen Furlong and István Andó for antibodies. We  
476 thank Eva Zacharioudaki, Alain Vincent and Michalis Averof for critical reading of the  
477 manuscript and other members of SJB lab for valuable discussion. This work was funded  
478 by a programme grant from the MRC to SJB and by an EMBO Long Term Fellowship for  
479 HB.

480

#### 481 **Competing interest**

482 The authors declare that they have no competing interests.

483

#### 484 **REFERENCES**

485 Alwes, F., Enjolras, C., and Averof, M. (2016). Live imaging reveals the progenitors and  
486 cell dynamics of limb regeneration. *Elife* 5.10.7554/eLife.19766

- 487 Anant, S., Roy, S., and VijayRaghavan, K. (1998). Twist and Notch negatively regulate  
488 adult muscle differentiation in *Drosophila*. *Development* 125, 1361-9
- 489 Antonello, Z.A., Reiff, T., Ballesta-Illan, E., and Dominguez, M. (2015). Robust intestinal  
490 homeostasis relies on cellular plasticity in enteroblasts mediated by miR-8-Escargot switch.  
491 *EMBO J* 34, 2025-41.10.15252/embj.201591517
- 492 Aradhya, R., Zmojdzian, M., Da Ponte, J.P., and Jagla, K. (2015). Muscle niche-driven  
493 Insulin-Notch-Myc cascade reactivates dormant Adult Muscle Precursors in *Drosophila*.  
494 *Elife* 4.10.7554/eLife.08497
- 495 Benlhabib, H., Guo, W., Pierce, B.M., and Mendelson, C.R. (2015). The miR-200 family  
496 and its targets regulate type II cell differentiation in human fetal lung. *J Biol Chem* 290,  
497 22409-22.10.1074/jbc.M114.636068
- 498 Bernard, F., Dutriaux, A., Silber, J., and Lalouette, A. (2006). Notch pathway repression by  
499 vestigial is required to promote indirect flight muscle differentiation in *Drosophila*  
500 *melanogaster*. *Dev Biol* 295, 164-77.10.1016/j.ydbio.2006.03.022
- 501 Bernard, F., Krejci, A., Housden, B., Adryan, B., and Bray, S.J. (2010). Specificity of Notch  
502 pathway activation: twist controls the transcriptional output in adult muscle progenitors.  
503 *Development* 137, 2633-42.10.1242/dev.053181
- 504 Bischof, J., Maeda, R.K., Hediger, M., Karch, F., and Basler, K. (2007). An optimized  
505 transgenesis system for *Drosophila* using germ-line-specific phiC31 integrases. *Proc Natl*  
506 *Acad Sci U S A* 104, 3312-7.10.1073/pnas.0611511104
- 507 Bjornson, C.R., Cheung, T.H., Liu, L., Tripathi, P.V., Steeper, K.M., and Rando, T.A.  
508 (2012). Notch signaling is necessary to maintain quiescence in adult muscle stem cells.  
509 *Stem Cells* 30, 232-42.10.1002/stem.773
- 510 Boutet, S.C., Cheung, T.H., Quach, N.L., Liu, L., Prescott, S.L., Edalati, A., Iori, K., and  
511 Rando, T.A. (2012). Alternative polyadenylation mediates microRNA regulation of muscle  
512 stem cell function. *Cell Stem Cell* 10, 327-36.10.1016/j.stem.2012.01.017
- 513 Brabletz, S., and Brabletz, T. (2010). The ZEB/miR-200 feedback loop--a motor of cellular  
514 plasticity in development and cancer? *EMBO Rep* 11, 670-7.10.1038/embor.2010.117
- 515 Chanet, S., Vodovar, N., Mayau, V., and Schweisguth, F. (2009). Genome engineering-  
516 based analysis of Bearded family genes reveals both functional redundancy and a  
517 nonessential function in lateral inhibition in *Drosophila*. *Genetics* 182, 1101-  
518 8.10.1534/genetics.109.105023
- 519 Chang, N.C., and Rudnicki, M.A. (2014). Satellite cells: the architects of skeletal muscle.  
520 *Curr Top Dev Biol* 107, 161-81.10.1016/B978-0-12-416022-4.00006-8

- 521 Chaturvedi, D., Reichert, H., and VijayRaghavan, K. (2017). Identification and Functional  
522 Characterization of Muscle Satellite Cells in *Drosophila*. bioRxiv  
523 <http://dx.doi.org/10.1101/037838>
- 524 Cripps, R.M., Lovato, T.L., and Olson, E.N. (2004). Positive autoregulation of the Myocyte  
525 enhancer factor-2 myogenic control gene during somatic muscle development in  
526 *Drosophila*. *Dev Biol* 267, 536-47.10.1016/j.ydbio.2003.12.004
- 527 Elgar, S.J., Han, J., and Taylor, M.V. (2008). *mef2* activity levels differentially affect gene  
528 expression during *Drosophila* muscle development. *Proc Natl Acad Sci U S A* 105, 918-  
529 23.10.1073/pnas.0711255105
- 530 Evans, C.J., Olson, J.M., Ngo, K.T., Kim, E., Lee, N.E., Kuoy, E., Patananan, A.N., Sitz, D.,  
531 Tran, P., Do, M.T., et al. (2009). G-TRACE: rapid Gal4-based cell lineage analysis in  
532 *Drosophila*. *Nat Methods* 6, 603-U70.10.1038/nmeth.1356
- 533 Figeac, N., Daczewska, M., Marcelle, C., and Jagla, K. (2007). Muscle stem cells and  
534 model systems for their investigation. *Dev Dyn* 236, 3332-42.10.1002/dvdy.21345
- 535 Figeac, N., Jagla, T., Aradhya, R., Da Ponte, J.P., and Jagla, K. (2010). *Drosophila* adult  
536 muscle precursors form a network of interconnected cells and are specified by the  
537 rhomboid-triggered EGF pathway. *Development* 137, 1965-73.10.1242/dev.049080
- 538 Fortini, M.E., and Artavanis-Tsakonas, S. (1993). Notch: neurogenesis is only part of the  
539 picture. *Cell* 75, 1245-7
- 540 Gunage, R.D., Reichert, H., and VijayRaghavan, K. (2014). Identification of a new stem  
541 cell population that generates *Drosophila* flight muscles. *Elife* 3.10.7554/eLife.03126
- 542 Hertz, G.Z., and Stormo, G.D. (1999). Identifying DNA and protein patterns with  
543 statistically significant alignments of multiple sequences. *Bioinformatics* 15, 563-77
- 544 Housden, B.E., Millen, K., and Bray, S.J. (2012). *Drosophila* Reporter Vectors Compatible  
545 with PhiC31 Integrase Transgenesis Techniques and Their Use to Generate New Notch  
546 Reporter Fly Lines. *G3 (Bethesda)* 2, 79-82.10.1534/g3.111.001321
- 547 Hunt, L.C., and Demontis, F. (2013). Whole-mount immunostaining of *Drosophila* skeletal  
548 muscle. *Nat Protoc* 8, 2496-501.10.1038/nprot.2013.156
- 549 Jenett, A., Rubin, G.M., Ngo, T.T., Shepherd, D., Murphy, C., Dionne, H., Pfeiffer, B.D.,  
550 Cavallaro, A., Hall, D., Jeter, J., et al. (2012). A GAL4-driver line resource for *Drosophila*  
551 neurobiology. *Cell Rep* 2, 991-1001.10.1016/j.celrep.2012.09.011
- 552 Jory, A., Estella, C., Giorgianni, M.W., Slattery, M., Lavery, T.R., Rubin, G.M., and Mann,  
553 R.S. (2012). A survey of 6,300 genomic fragments for cis-regulatory activity in the imaginal  
554 discs of *Drosophila melanogaster*. *Cell Rep* 2, 1014-24.10.1016/j.celrep.2012.09.010

- 555 Kaltschmidt, J.A., Davidson, C.M., Brown, N.H., and Brand, A.H. (2000). Rotation and  
556 asymmetry of the mitotic spindle direct asymmetric cell division in the developing central  
557 nervous system. *Nat Cell Biol* 2, 7-12.10.1038/71323
- 558 Karres, J.S., Hilgers, V., Carrera, I., Treisman, J., and Cohen, S.M. (2007). The conserved  
559 microRNA miR-8 tunes atrophin levels to prevent neurodegeneration in *Drosophila*. *Cell*  
560 131, 136-45.10.1016/j.cell.2007.09.020
- 561 Kennell, J.A., Cadigan, K.M., Shakhmantsir, I., and Waldron, E.J. (2012). The microRNA  
562 miR-8 is a positive regulator of pigmentation and eclosion in *Drosophila*. *Dev Dyn* 241,  
563 161-8.10.1002/dvdy.23705
- 564 Konstantinides, N., and Averof, M. (2014). A common cellular basis for muscle  
565 regeneration in arthropods and vertebrates. *Science* 343, 788-  
566 91.10.1126/science.1243529
- 567 Korpai, M., Lee, E.S., Hu, G., and Kang, Y. (2008). The miR-200 family inhibits epithelial-  
568 mesenchymal transition and cancer cell migration by direct targeting of E-cadherin  
569 transcriptional repressors ZEB1 and ZEB2. *J Biol Chem* 283, 14910-  
570 4.10.1074/jbc.C800074200
- 571 Krejci, A., Bernard, F., Housden, B.E., Collins, S., and Bray, S.J. (2009). Direct response  
572 to Notch activation: signaling crosstalk and incoherent logic. *Sci Signal* 2,  
573 ra1.10.1126/scisignal.2000140
- 574 Krejci, A., and Bray, S. (2007). Notch activation stimulates transient and selective binding  
575 of Su(H)/CSL to target enhancers. *Genes Dev* 21, 1322-7.10.1101/gad.424607
- 576 Lamas-Maceiras, M., Singh, B.N., Hampsey, M., and Freire-Picos, M.A. (2016). Promoter-  
577 Terminator Gene Loops Affect Alternative 3'-End Processing in Yeast. *J Biol Chem* 291,  
578 8960-8.10.1074/jbc.M115.687491
- 579 Li, L., and Clevers, H. (2010). Coexistence of quiescent and active adult stem cells in  
580 mammals. *Science* 327, 542-5.10.1126/science.1180794
- 581 Manning, L., Heckscher, E.S., Purice, M.D., Roberts, J., Bennett, A.L., Kroll, J.R., Pollard,  
582 J.L., Strader, M.E., Lupton, J.R., Dyukareva, A.V., et al. (2012). A resource for  
583 manipulating gene expression and analyzing cis-regulatory modules in the *Drosophila*  
584 CNS. *Cell Rep* 2, 1002-13.10.1016/j.celrep.2012.09.009
- 585 McGuire, S.E., Le, P.T., Osborn, A.J., Matsumoto, K., and Davis, R.L. (2003).  
586 Spatiotemporal rescue of memory dysfunction in *Drosophila*. *Science* 302, 1765-  
587 8.10.1126/science.1089035

- 588 Mourikis, P., Gopalakrishnan, S., Sambasivan, R., and Tajbakhsh, S. (2012). Cell-  
589 autonomous Notch activity maintains the temporal specification potential of skeletal  
590 muscle stem cells. *Development* 139, 4536-48.10.1242/dev.084756
- 591 Mourikis, P., and Tajbakhsh, S. (2014). Distinct contextual roles for Notch signalling in  
592 skeletal muscle stem cells. *BMC Dev Biol* 14, 2.10.1186/1471-213X-14-2
- 593 Park, S.M., Gaur, A.B., Lengyel, E., and Peter, M.E. (2008). The miR-200 family  
594 determines the epithelial phenotype of cancer cells by targeting the E-cadherin repressors  
595 ZEB1 and ZEB2. *Genes Dev* 22, 894-907.10.1101/gad.1640608
- 596 Pinto, P.A., Henriques, T., Freitas, M.O., Martins, T., Domingues, R.G., Wyrzykowska,  
597 P.S., Coelho, P.A., Carmo, A.M., Sunkel, C.E., Proudfoot, N.J., et al. (2011). RNA  
598 polymerase II kinetics in polo polyadenylation signal selection. *EMBO J* 30, 2431-  
599 44.10.1038/emboj.2011.156
- 600 Port, F., Chen, H.M., Lee, T., and Bullock, S.L. (2014). Optimized CRISPR/Cas tools for  
601 efficient germline and somatic genome engineering in *Drosophila*. *Proc Natl Acad Sci U S*  
602 *A* 111, E2967-76.10.1073/pnas.1405500111
- 603 Postigo, A.A., and Dean, D.C. (1999). ZEB represses transcription through interaction with  
604 the corepressor CtBP. *Proc Natl Acad Sci U S A* 96, 6683-8
- 605 Postigo, A.A., Ward, E., Skeath, J.B., and Dean, D.C. (1999). *zfh-1*, the *Drosophila*  
606 homologue of ZEB, is a transcriptional repressor that regulates somatic myogenesis. *Mol*  
607 *Cell Biol* 19, 7255-63
- 608 Proudfoot, N.J. (2016). Transcriptional termination in mammals: Stopping the RNA  
609 polymerase II juggernaut. *Science* 352, aad9926.10.1126/science.aad9926
- 610 Ranganayakulu, G., Schulz, R.A., and Olson, E.N. (1996). Wingless signaling induces  
611 nautilus expression in the ventral mesoderm of the *Drosophila* embryo. *Dev Biol* 176, 143-  
612 8.10.1006/dbio.1996.9987
- 613 Rebay, I., Fehon, R.G., and Artavanis-Tsakonas, S. (1993). Specific truncations of  
614 *Drosophila* Notch define dominant activated and dominant negative forms of the receptor.  
615 *Cell* 74, 319-29
- 616 Sandberg, R., Neilson, J.R., Sarma, A., Sharp, P.A., and Burge, C.B. (2008). Proliferating  
617 cells express mRNAs with shortened 3' untranslated regions and fewer microRNA target  
618 sites. *Science* 320, 1643-7.10.1126/science.1155390
- 619 Siles, L., Sanchez-Tillo, E., Lim, J.W., Darling, D.S., Kroll, K.L., and Postigo, A. (2013).  
620 ZEB1 imposes a temporary stage-dependent inhibition of muscle gene expression and  
621 differentiation via CtBP-mediated transcriptional repression. *Mol Cell Biol* 33, 1368-  
622 82.10.1128/MCB.01259-12

- 623 Simon, R., Aparicio, R., Housden, B.E., Bray, S., and Busturia, A. (2014). *Drosophila* p53  
624 controls Notch expression and balances apoptosis and proliferation. *Apoptosis* 19, 1430-  
625 43.10.1007/s10495-014-1000-5
- 626 Sudarsan, V., Anant, S., Guptan, P., VijayRaghavan, K., and Skaer, H. (2001). Myoblast  
627 diversification and ectodermal signaling in *Drosophila*. *Dev Cell* 1, 829-39
- 628 Tian, B., Hu, J., Zhang, H., and Lutz, C.S. (2005). A large-scale analysis of mRNA  
629 polyadenylation of human and mouse genes. *Nucleic Acids Res* 33, 201-  
630 12.10.1093/nar/gki158
- 631 Tian, B., and Manley, J.L. (2013). Alternative cleavage and polyadenylation: the long and  
632 short of it. *Trends Biochem Sci* 38, 312-20.10.1016/j.tibs.2013.03.005
- 633 Vallejo, D.M., Caparros, E., and Dominguez, M. (2011). Targeting Notch signalling by the  
634 conserved miR-8/200 microRNA family in development and cancer cells. *EMBO J* 30, 756-  
635 69.10.1038/emboj.2010.358
- 636 Vandewalle, C., Van Roy, F., and Berx, G. (2009). The role of the ZEB family of  
637 transcription factors in development and disease. *Cell Mol Life Sci* 66, 773-  
638 87.10.1007/s00018-008-8465-8
- 639 Vigoreaux, J.O. (2001). Genetics of the *Drosophila* flight muscle myofibril: a window into  
640 the biology of complex systems. *Bioessays* 23, 1047-63.10.1002/bies.1150
- 641 Yatsenko, A.S., Marrone, A.K., and Shcherbata, H.R. (2014). miRNA-based buffering of  
642 the cobblestone-lissencephaly-associated extracellular matrix receptor dystroglycan via its  
643 alternative 3'-UTR. *Nat Commun* 5, 4906.10.1038/ncomms5906
- 644 Zaravinos, A. (2015). The Regulatory Role of MicroRNAs in EMT and Cancer. *J Oncol*  
645 2015, 865816.10.1155/2015/865816
- 646 Zhang, H., Lee, J.Y., and Tian, B. (2005). Biased alternative polyadenylation in human  
647 tissues. *Genome Biol* 6, R100.10.1186/gb-2005-6-12-r100

648

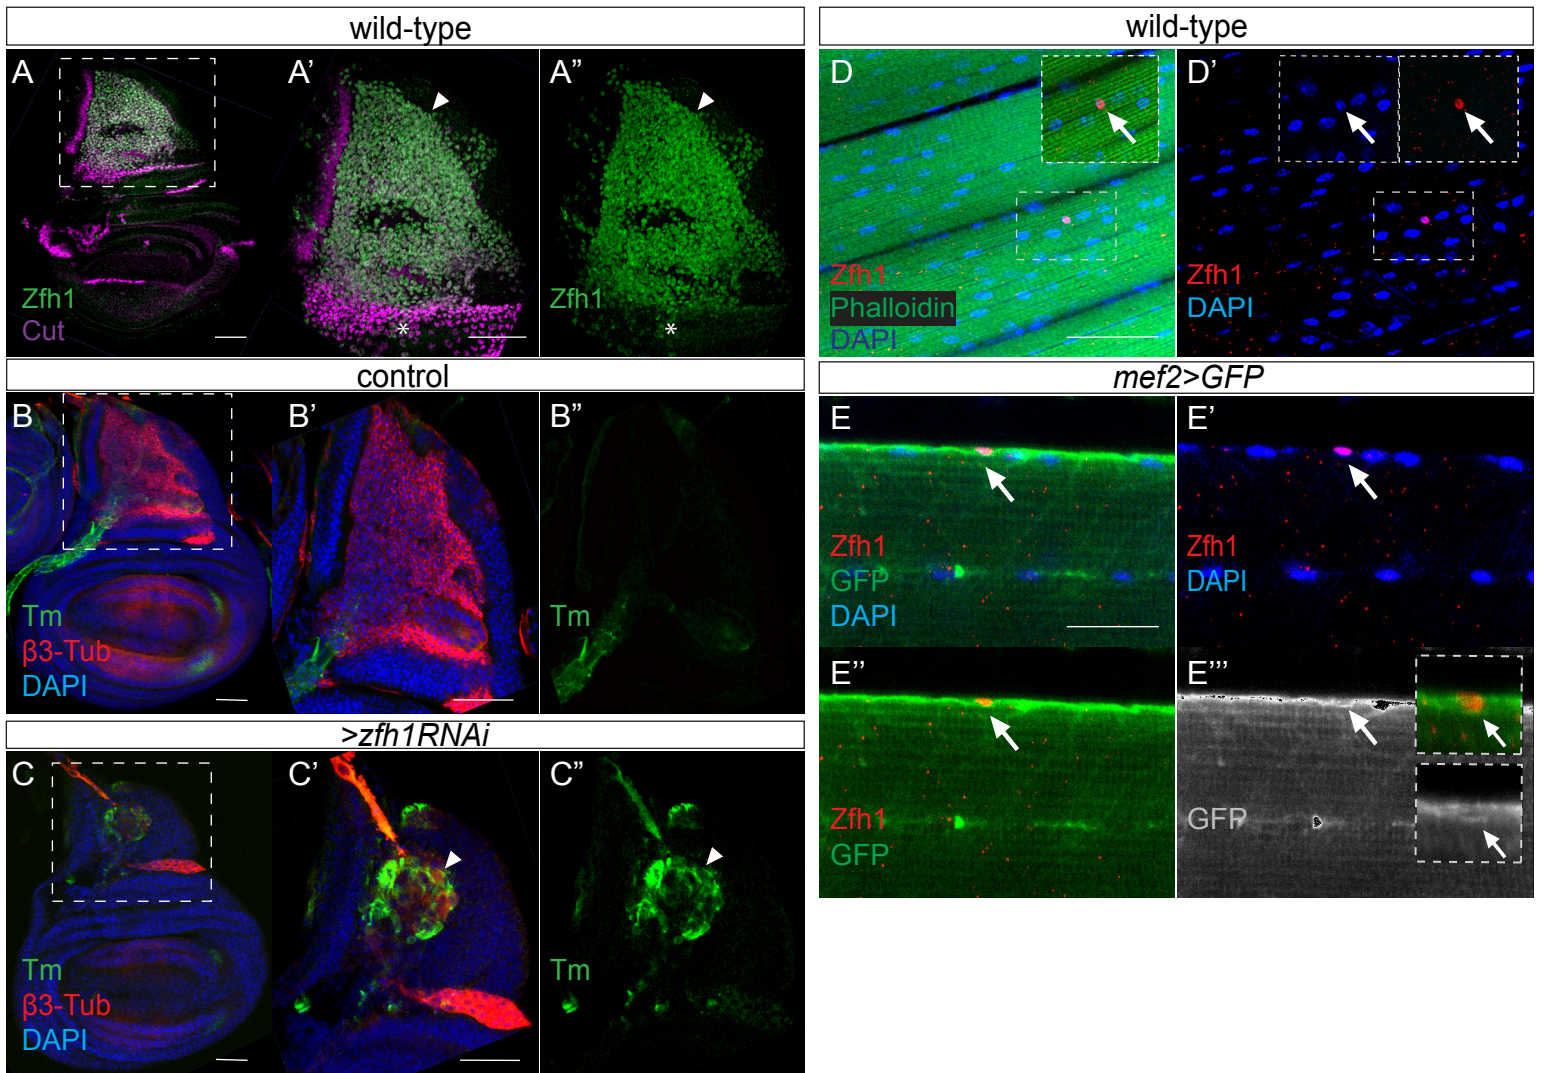

**Figure 1. Zfh1 expression and function in MPs and in adult pMPs.**

**(A-A'')**. Zfh1 (Green) and Cut (Purple) expression in MPs associated with third instar wing discs, **(A'-A'')**. higher magnification (3X) of boxed region in A. Zfh1 is present in all MPs, but those with highest Cut expression have lower levels of Zfh1 (asterisk). Scale bars: 50  $\mu$ M. **(B-C)**. Down regulation of *zfh1* in MPs induces premature differentiation of the MPs (arrowhead in C'-C'').  $\beta$ 3-Tubulin ( $\beta$ 3-Tub, red) and Tropomyosin (Tm, Green) expression in control (B, *1151-Gal4>UAS-wRNAi*) and Zfh1 depleted (C, *1151-Gal4>UAS-Zfh1RNAi*) third instar wing discs, **(B'-C'')** higher magnification (3X) of boxed regions in B and C. **(D-D')**. Zfh1 expression (red) indicates the existence of persistent muscle progenitors (pMPs; arrows) associated with the muscle fibers (Phalloidin (Green), DNA/Nuclei (Blue)). The immune cell marker P1 was included in the immunostaining and is absent from the pMPs (Figure supplement 1). Scale bars: 50  $\mu$ M. **(E-E'')**. Zfh1 (Red) expressing pMPs (e.g. arrows in E'') are closely embedded in the muscle lamina of the adult indirect flight muscles and express Mef2 (myogenic cells; *Mef2-Gal4>UAS-Src::GFP*, green). Nuclei (Blue), Scale bars: 25  $\mu$ M.



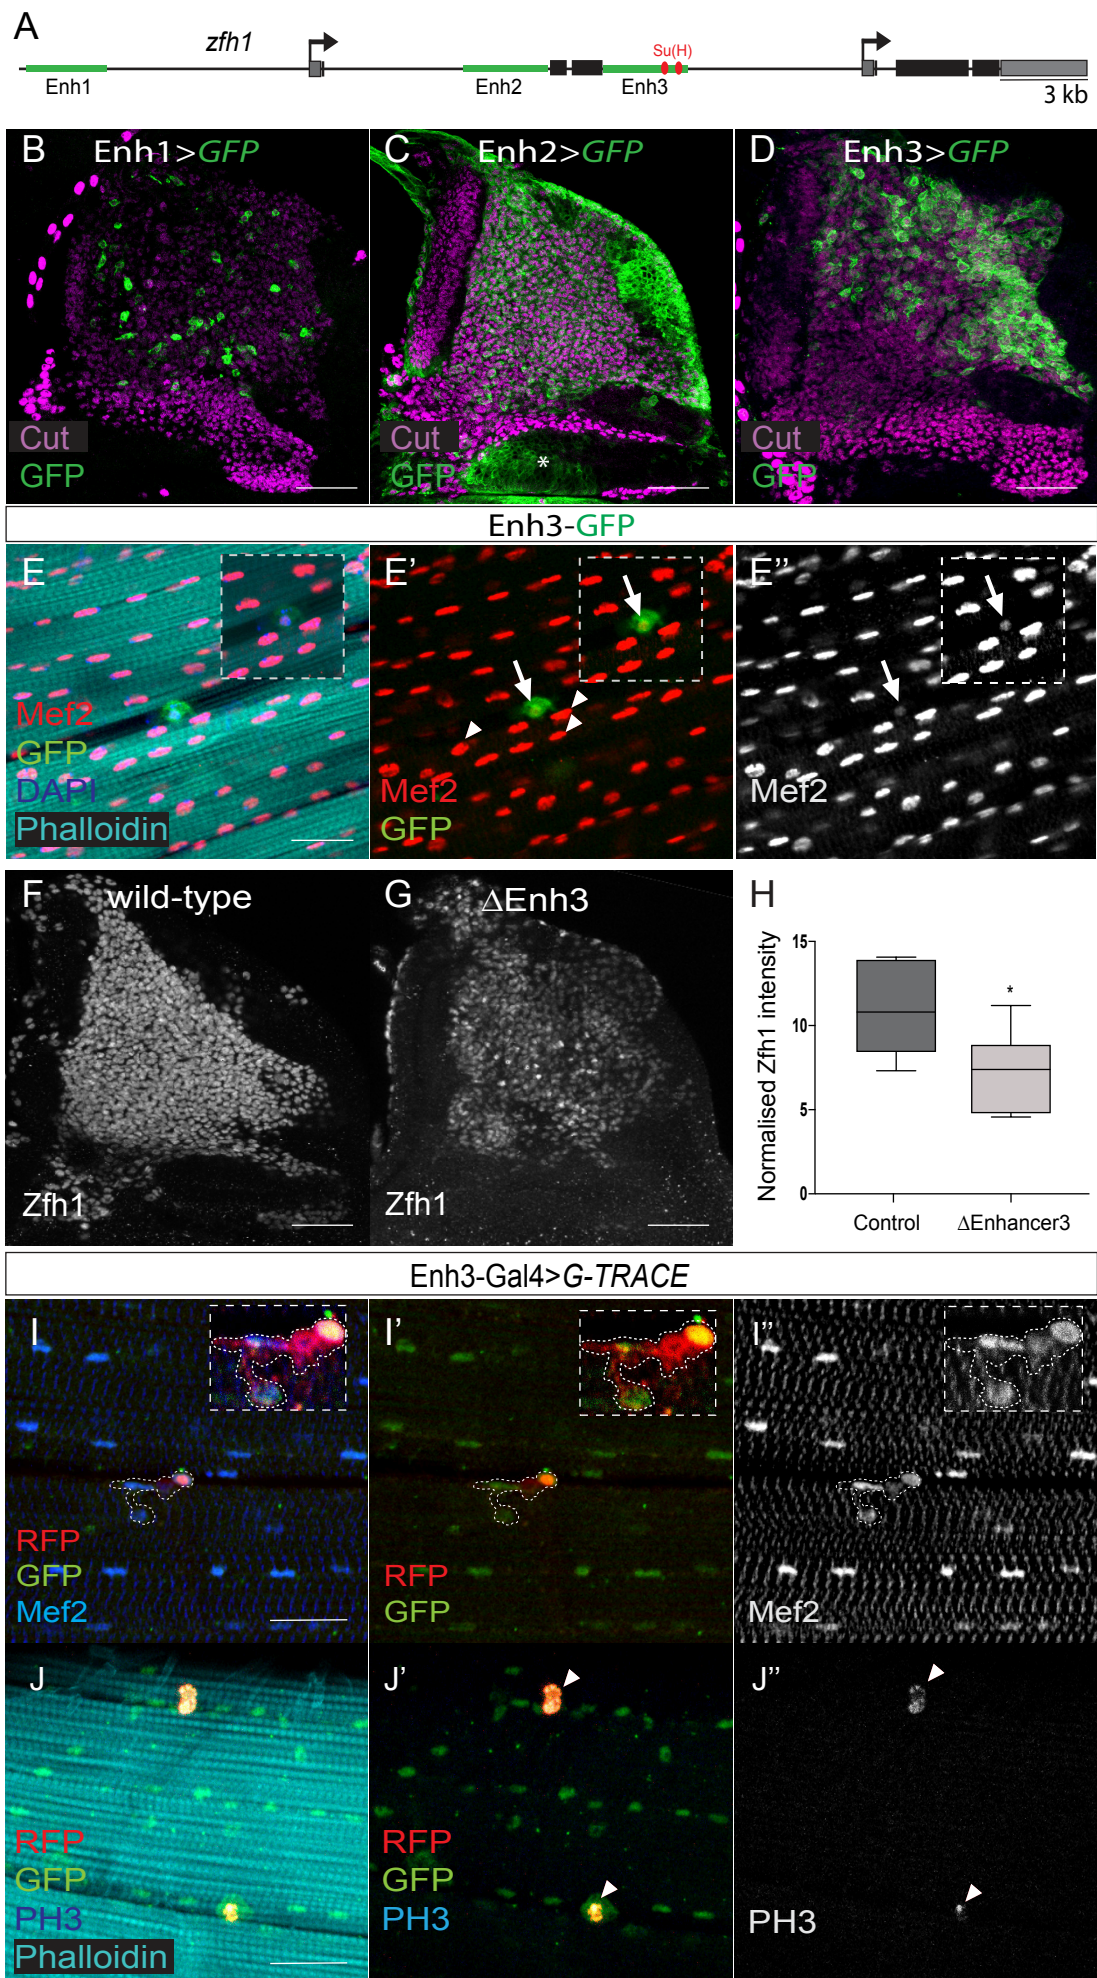

**Figure 2. Regulation of *zfh1* in MPs and adult pMPs.**

**Figure 2. Regulation of *zfh1* in MPs and adult pMPs. (A).** Schematic view of *zfh1* genomic region, *zfh1* regulatory enhancers are represented by green rectangles and arrows indicate transcription starts. Coding exons and untranslated regions are represented in black and grey boxes, respectively. **(B-D).** Three different *zfh1* enhancers are active in the MPs (labelled with Cut, purple). *Enh1-Gal4* (VT050105, B) drives GFP (Green) in a subset of scattered MPs; *Enh2-Gal4* (VT050115, C) drives GFP throughout the MPs, and in some non-MP cells (Asterisk); *Enh3-Gal4* (GMR35H09, D) is highly expressed in a subset of MPs located in the posterior region of the notum. Scale bars: 50  $\mu$ M. **(E-E'').** *Enh3-GFP* (Green) expression is retained in pMPs (characterised by low level of Mef2, red; arrows E'-E'') but not in differentiated muscle nuclei (high Mef2, red; arrowheads E'-E''). Phalloidin marks muscles and DAPI labels all nuclei (Blue). Insets: boxed regions magnified 12.5 X. Scale bars : 25  $\mu$ M. **(F-H).** *Zfh1* (white) expression in MPs is significantly reduced in discs from *Enh3* deletion  $\Delta$ *Enh3* (G, H) compared to controls (F, H). (\*  $p= 0.0379$ ,  $n =13$ , Student t-test). Scale bars: 50  $\mu$ M. **(I-J'').** Lineage tracing shows that adult pMPs contribute to muscles. Indirect flight muscles from adult flies where *Enh3-Gal4* drives expression of the G-Trace cassette; GFP (Green) indicates myoblasts that have expressed *Enh3-Gal4*, RFP (red) indicates myoblasts where Gal4 is still active, Mef2 labels muscle nuclei (Blue). Insets: boxed regions magnified 20 X. **(J-J'').** pMPs are mitotically active, indicated by anti-phosphH3 (Blue, arrowheads J'-J'').

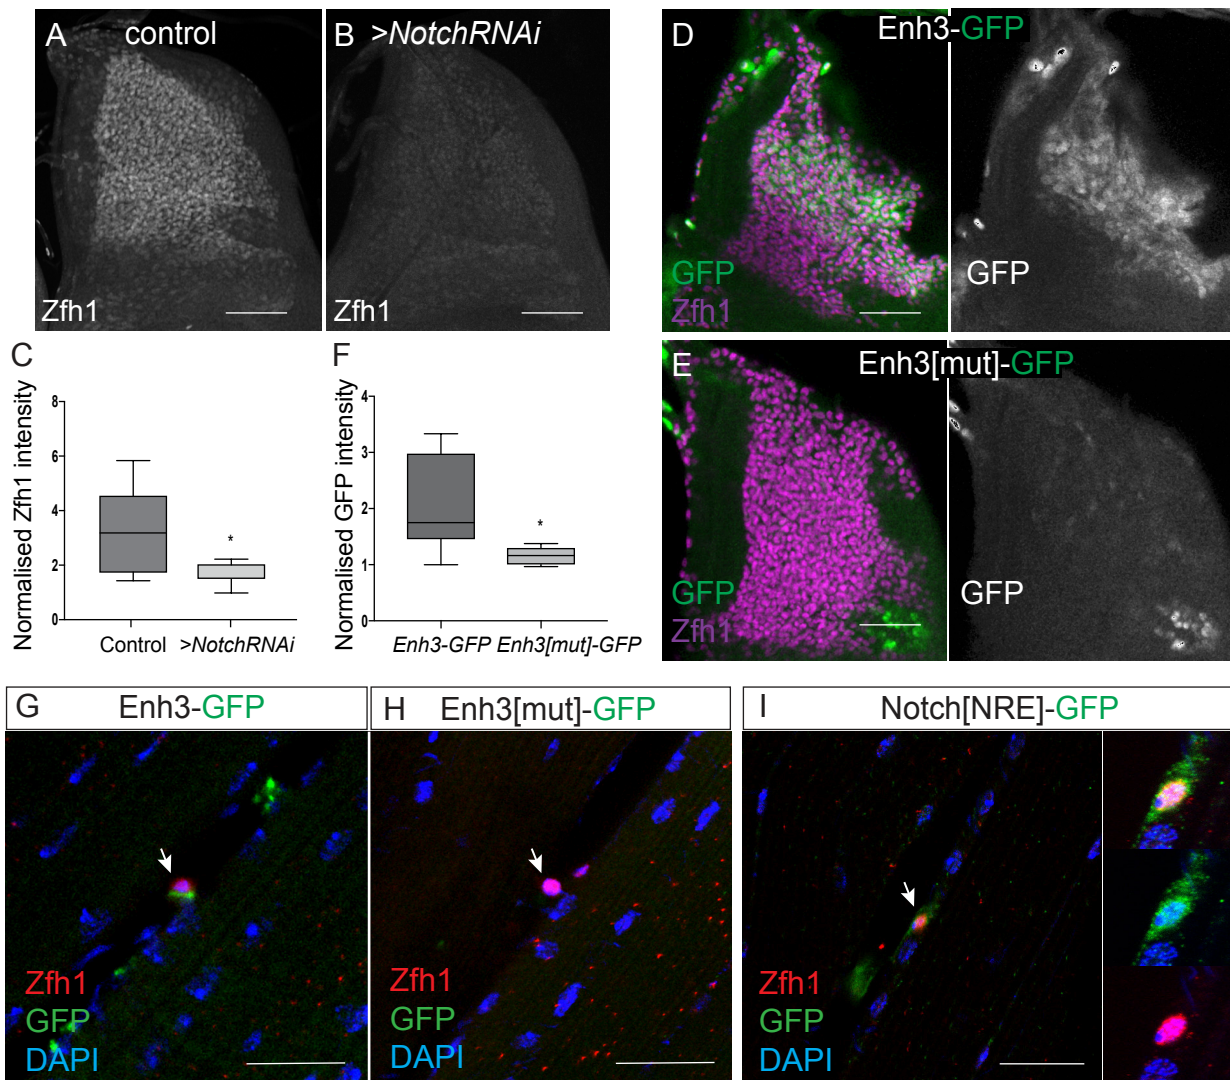

**Figure 3. Notch directs Zfh1 expression in MPs and pMPs.**

**(A-C).** Zfh1 level (white) is significantly reduced when *Notch* is down regulated. Expression of Zfh1 in MPs (A) is severely reduced in the presence of *Notch RNAi* (B, *1151-Gal4>UAS-NotchRNAi*), Scale Bars: 50  $\mu$ M. (C) Quantification of Zfh1 expression levels (\*  $p < 0.05$ ,  $n = 12$ ). **(D-F).** Enh3 (D, *Enh3-GFP*, green) expression in MPs (purple, Zfh1) is abolished when Su(H) motifs are mutated (E, *Enh3[mut]-GFP*). Scale bars: 50  $\mu$ M. (F) Intensity of expression from *Enh3* and *Enh3[mut]* was significantly different (\*  $p = 0.022$ ,  $n = 14$ , Student t-test). **(G-H).** Enh3 (G, *Enh3-GFP*, green) expression in adult pMPs (red, Zfh1) is abolished when Su(H) motifs are mutated (H, *Enh3[mut]-GFP*, green), DAPI (blue) reveals all nuclei. **(I).** *Notch[NRE]-GFP* (green) is co-expressed with Zfh1 (red) in the pMPs associated with the indirect flight muscle; DAPI (Blue) detects all nuclei. (N=12 pMPs). In G-I anti-P1 was included to label immune cells and exclude them from the analysis. Scale bars: 25  $\mu$ M.

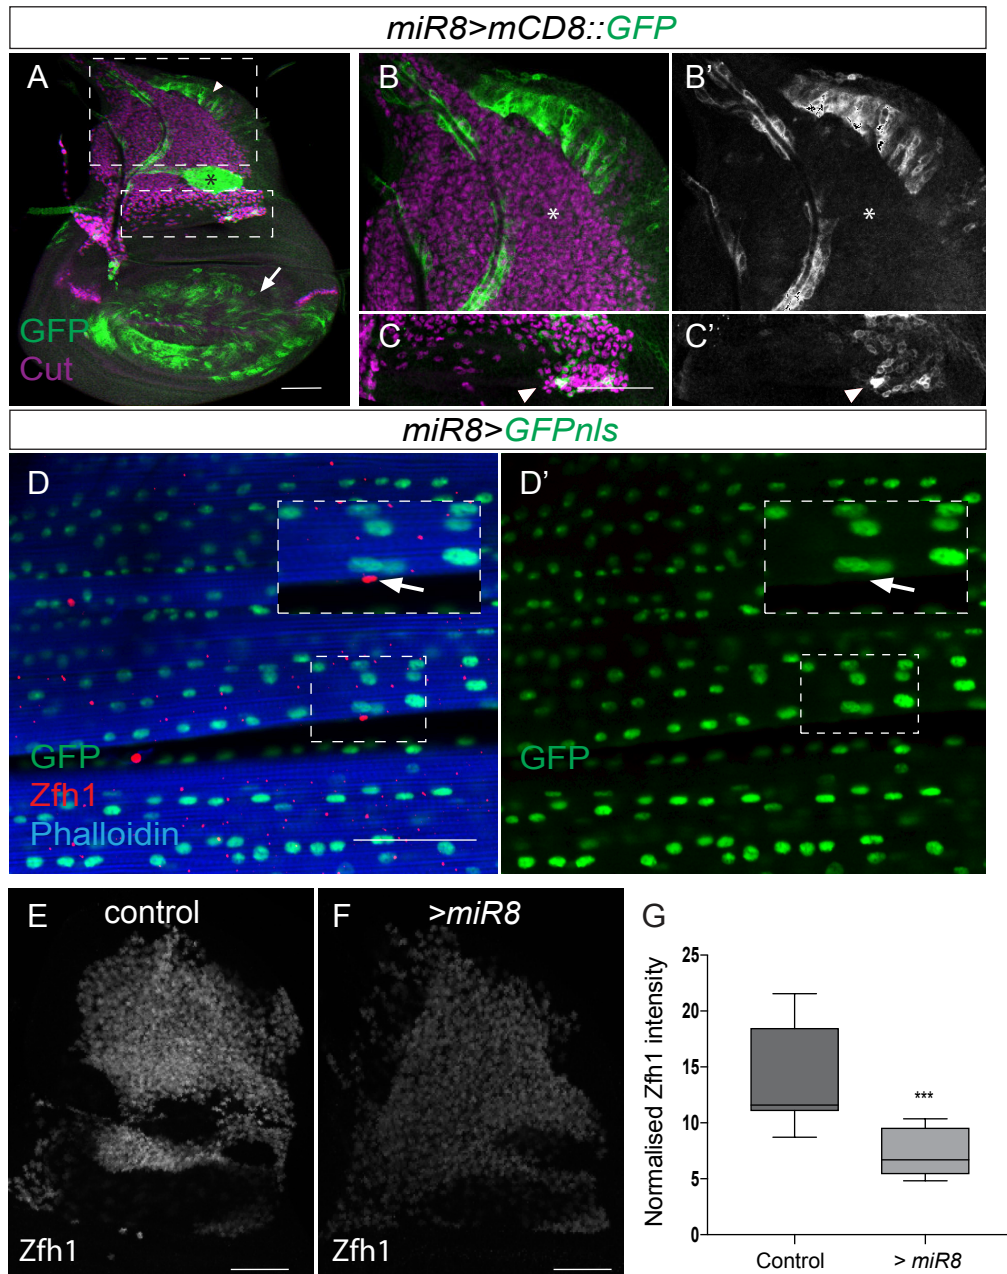

**Figure 4. The conserved MicroRNA *miR-8/miR-200* antagonizes *zfh1* to promote muscle differentiation.**

**(A-C).** Expression of *miR-8* is complementary to *Zfh1*; *miR-8* (green, *miR-8-Gal4>UAS-mCD8::GFP*) is not highly expressed in MPs (*Cut*, Purple) but is prevalent in the wing disc pouch (arrow), notum (arrowhead) and air sac (asterisk). Higher magnification shows that some *miR-8* expression can be detected in MPs where *Zfh1* is normally low (arrowhead in C) but not in other MPs. Scale bars: 50  $\mu$ M. **(D-D')** *miR-8* (green; *miR-8-Gal4>UAS-nlsGFP*) expression is absent from *Zfh1*+ve (red) pMPs (arrows, D-D') but is present at uniformly high levels in IFMs, (phalloidin, blue). Scale bars: 50  $\mu$ M. **(E-G).** Effect of *miR-8* overexpression (*1151-Gal4>UAS-miR-8*) on *Zfh1* (white) protein level in MPs. Scale Bars: 50  $\mu$ M. **(G)** *Zfh1* expression is significantly reduced by *miR-8* over-expression. (\*\*\*)  $p = 0.0009$ ,  $n = 11$ , Student t-test).

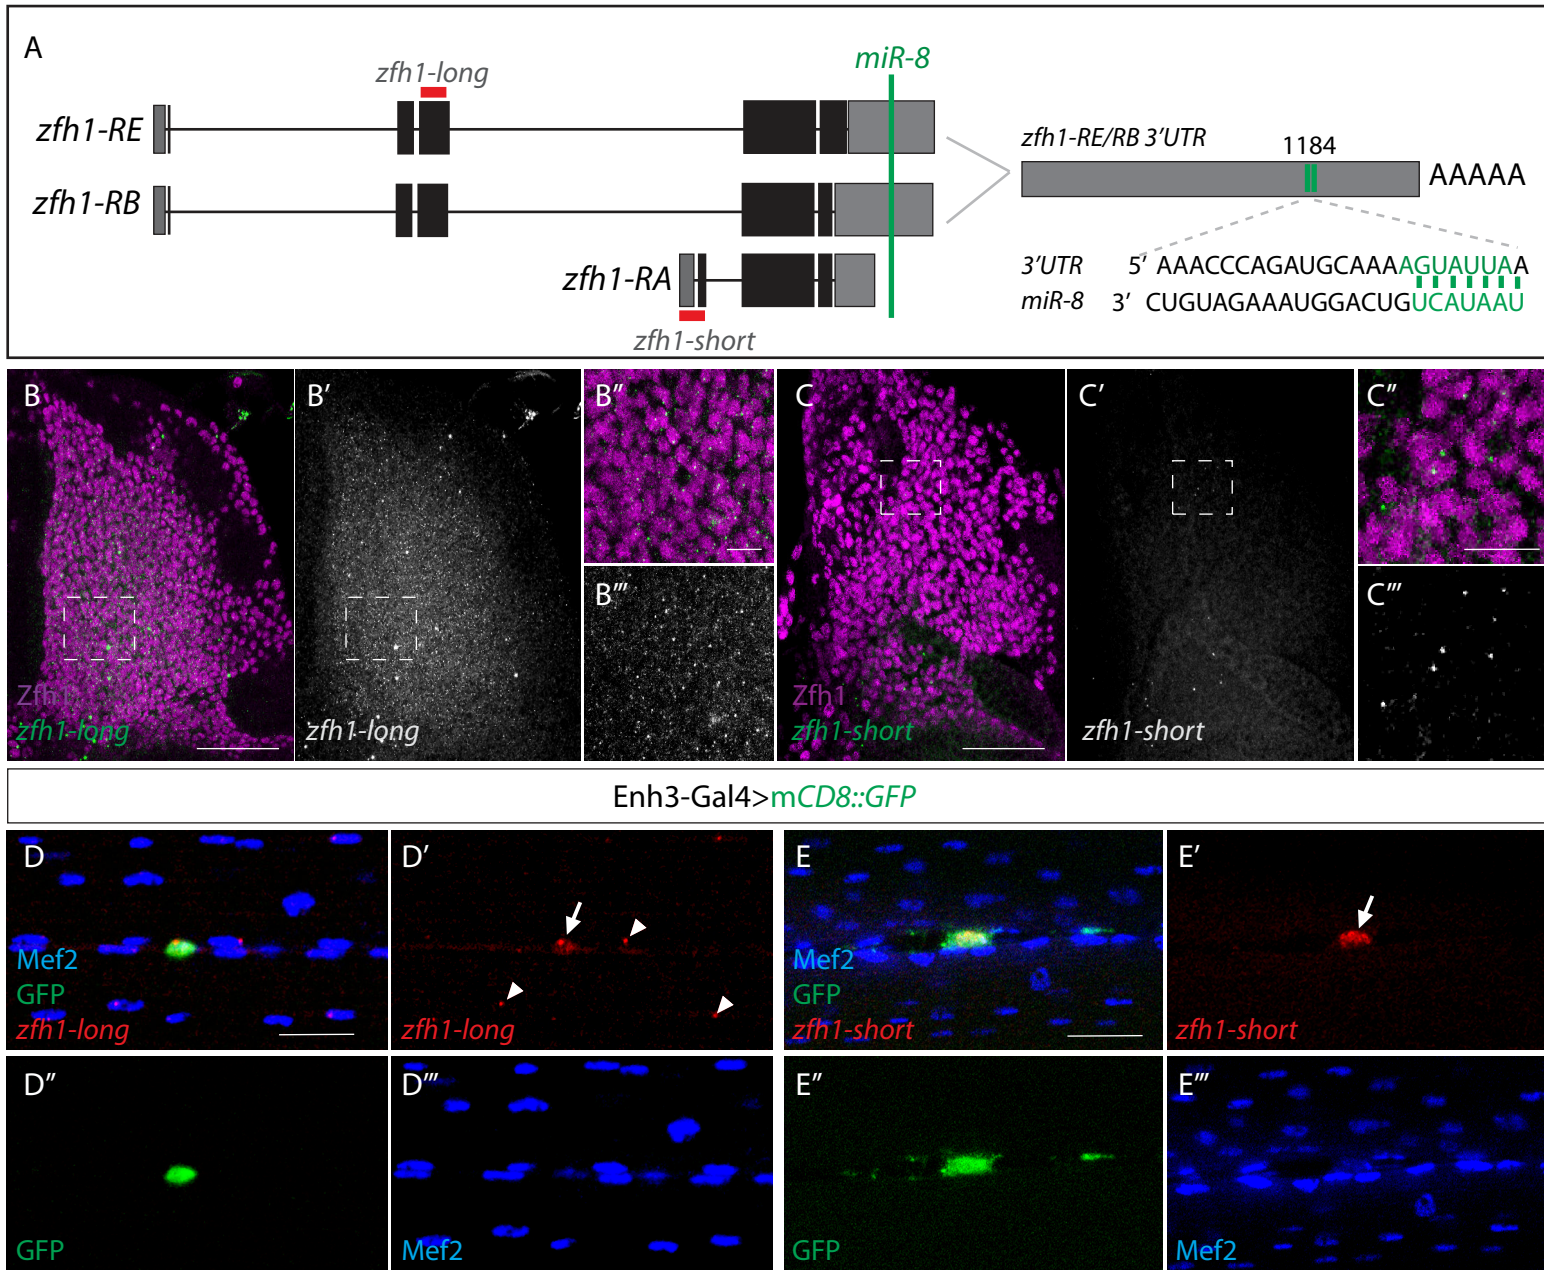

**Figure 5. *zfh1* escapes *mir-8* regulation via a variable 3'UTR.**

**A.** Schematic representation of *zfh1* isoforms. *zfh1-short* (*zfh1-RA*) is initiated from a different transcription start site and has shorter 3'UTR that lack the target site for *mir-8* (green;(Antonello, et al., 2015)) present in *zfh1-long* isoforms (*zfh1-RB*, *zfh1-RE*); the position of the *mir-8* seed sites in *zfh1-long* 3' UTR are depicted. Non-coding exons and coding exons are depicted by grey and black boxes respectively, red lines indicate the probes used for FISH experiments in B-E. **(B-C).** *zfh1-long* is present uniformly in MPs (B, green; B', white) whereas *zfh1-short* is only detected in a few MPs (C, green; C', white), detected by *in situ hybridisation* in wild type third instar wing discs stained for *Zfh1* (Purple). Scale bars: 10  $\mu$ M. (B'',B''',C''C''') Higher magnifications of boxed regions (Scale bars : 50  $\mu$ M). **(D-E).** In adult IFMs *zfh1-long* is detected in the pMPs (arrow in D') and in some differentiated nuclei located in their vicinity (arrowheads in D') whereas *zfh1-short* is only present in pMPs (arrow in E'). *Enh3* expression (green, *Enh3-Gal4>UAS-mCD8GFP*) labels adult pMPs and *Mef2* labels all muscle nuclei. Scale bars: 20  $\mu$ M.

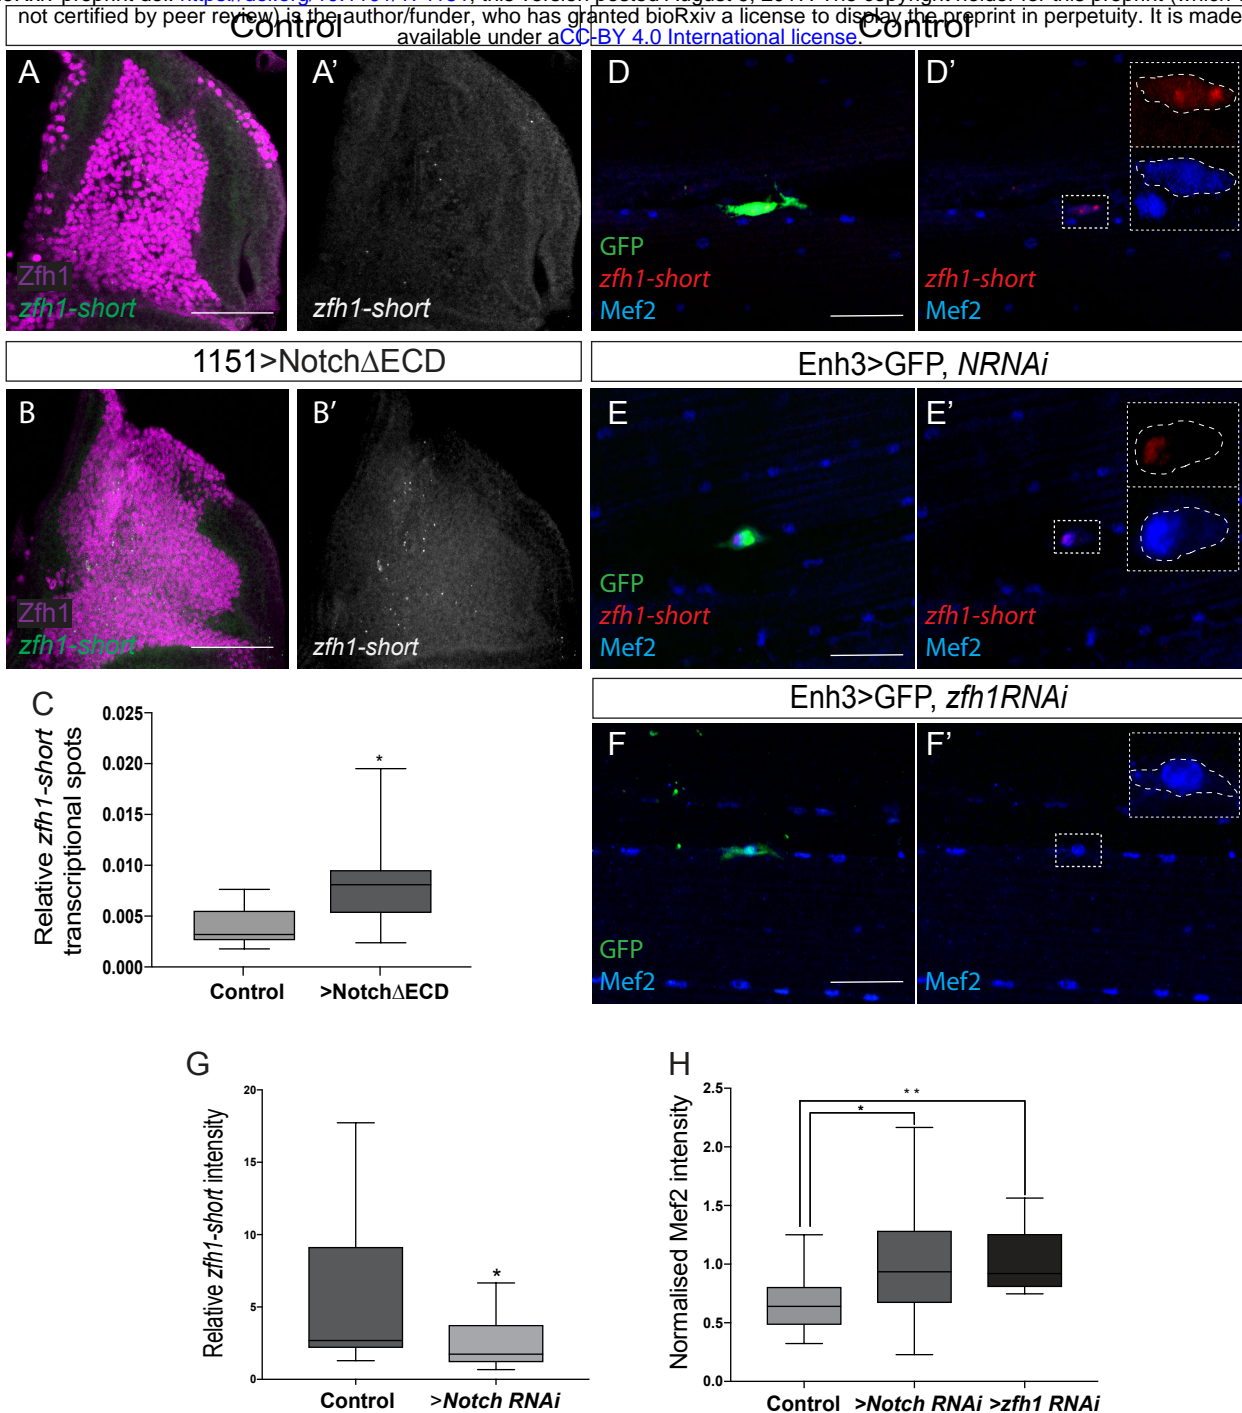

## Figure 6. Notch is required to transcribe *zfh1-short* in the pMPs.

(A-C). Expression of an activated Notch (1151-Gal4>UAS-N $\Delta$ ECD) in MPs induces ectopic *zfh1-short* transcription. *In situ* hybridisation detecting *zfh1-short* (green) in MPs (Zfh1, purple) with wild type (A-A') or elevated Notch activity (B-B'). Scale bars: 50  $\mu$ M. (C). Quantification showing significant increase in nuclear puncta of *zfh1-short* upon Notch up regulation (\*  $p = 0.014$ ,  $n = 10$ , Student t-test). (D-E). Notch depletion leads to a severe decrease in *zfh1-short* (red) (D'-E' and G) in pMPs (green; *Enh3-Gal4*>UAS-*mCD8GFP*) and to an increase in Mef2 levels (F-F'). *Enh3-Gal4* was used to drive expression of control RNAi (D-D'), *Notch RNAi* (E-E'), or *zfh1 RNAi* (F-F') specifically in pMPs. Mef2 (blue) marks all muscle and pMP nuclei. Scale bars: 25  $\mu$ M. (G-H). Quantification of *zfh1-short* (G) and of Mef2 (H) in the indicated conditions, levels are significantly different (\*  $p = 0.0417$ ,  $n = 14$  in G; \*  $p = 0.03$ ,  $n = 13$  (*Notch RNAi*) and \*\*  $p = 0.0029$ ,  $n = 14$  (*Zfh1 RNAi*) in H).

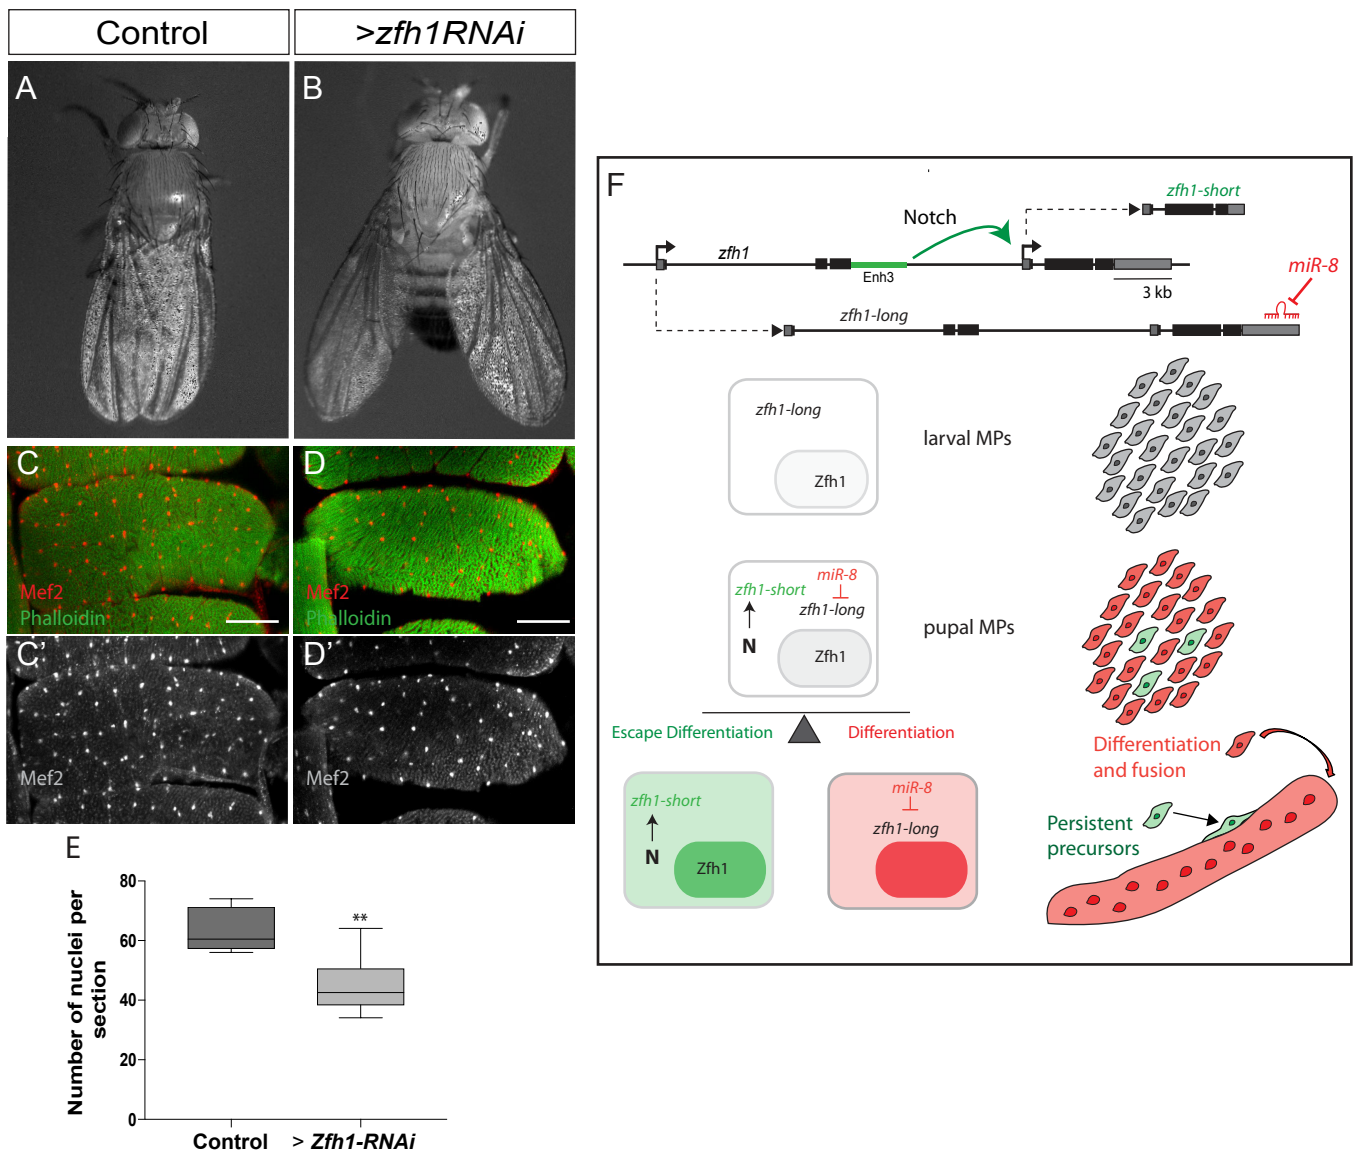

**Figure 7. Zfh1 expression in pMPs is important to maintain muscle homeostasis.**

(A-B). Prolonged *zfh1* depletion in pMPs leads to a “held out” wings posture; dorsal view of (A) control (*Enh3-Gal4>UAS-wRNAi; tubGal80ts*) and (B) *zfh1* depletion (*Enh3-Gal4>UAS-zfh1RNAi; tubGal80ts*) adult flies. (C-E). Fewer Mef2+ve nuclei are present in muscles when *zfh1* is depleted from pMPs. Transverse sections of DLM4 muscle stained with Phalloidin (green) and Mef2 (red, white) from the indicated genotypes. Scale bars: 50  $\mu$ m. (E) The number of nuclei per section in the

indicated conditions was significantly different. (\*\*  $p = 0.0013$ ,  $n=10$ , Student t-test). (F). Model summarizing the role of alternate *zfh1* isoforms in the maintenance of adult pMPs. *zfh1-long* (Grey) is expressed in all MPs at larval stage. Silencing of *zfh1-long* by *miR-8* (Red) facilitates the MPs differentiation. *zfh1-short* (Green) transcription is driven and maintained in pMPs by a Notch responsive element (*Enh3*, Green rectangle). Because *zfh1-short* is invisible to *miR-8*, Zfh1 protein is maintained in pMPs, enabling them to escape differentiation and persist as MPs in the adult.

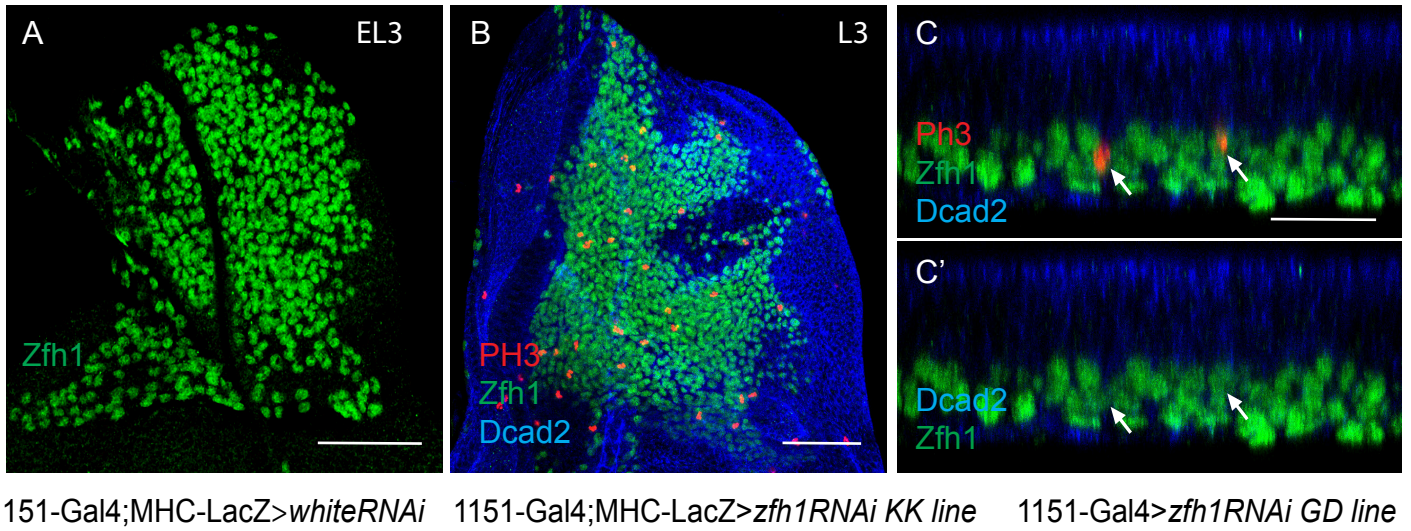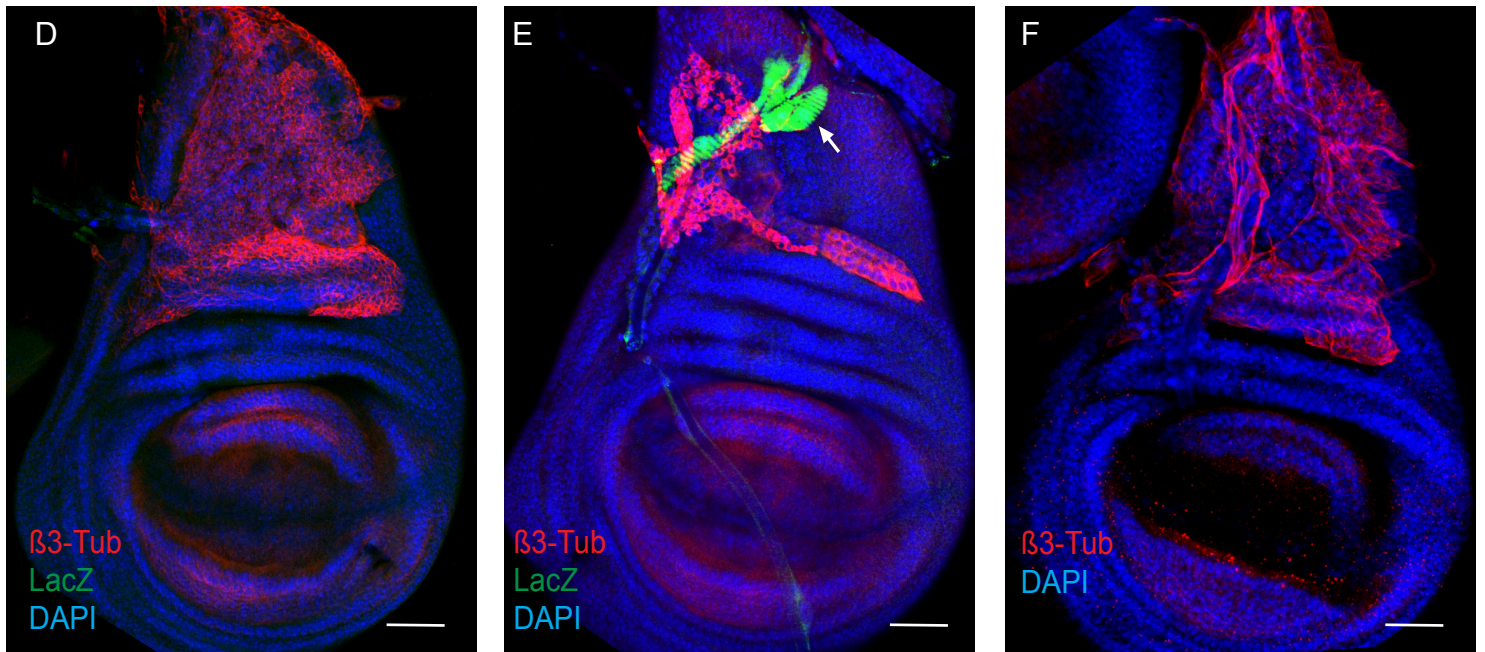

**Figure supplement 1. A.** Zfh1 (Green) expression in MPs associated with early third instar wing discs showing that at this stage Zfh1 is uniformly expressed in all the MPs. Scale bar : 50 μM. **B.** Third instar wing discs stained for Zfh1 (Green), PH3 (Red) and Dcad2 (Blue) revealing that some MPs are undertaking mitotic divisions. Scale bar: 50 μM. **(C-C')**. Optical section of image B showing active mitotic division of Zfh1 MPs in the most proximal layer to the disc epithelium (Arrows). Scale bar: 25 μM. **(D-F)**. β3-Tubulin (β3-Tub, red), LacZ (Green) and DAPI (Blue) expression in control (D, *1151-Gal4; mhc-lacZ > UAS-white-RNAi*) and *zfh1* down regulation (*1151-Gal4>UAS-zfh1-RNAi*) with two different RNAi transgenes, KK 103205 and GD42856, in E and F, respectively. Scale bars : 50 μM. **E.** Premature differentiation of MPs is observed using the KK103205 RNAi line comparing to the control (Arrow). **F.** Intermediate MPs differentiation phenotype is evident with the GD42856 RNAi transgene. MPs adopt an elongated morphology without expressing any muscle differentiation marker.



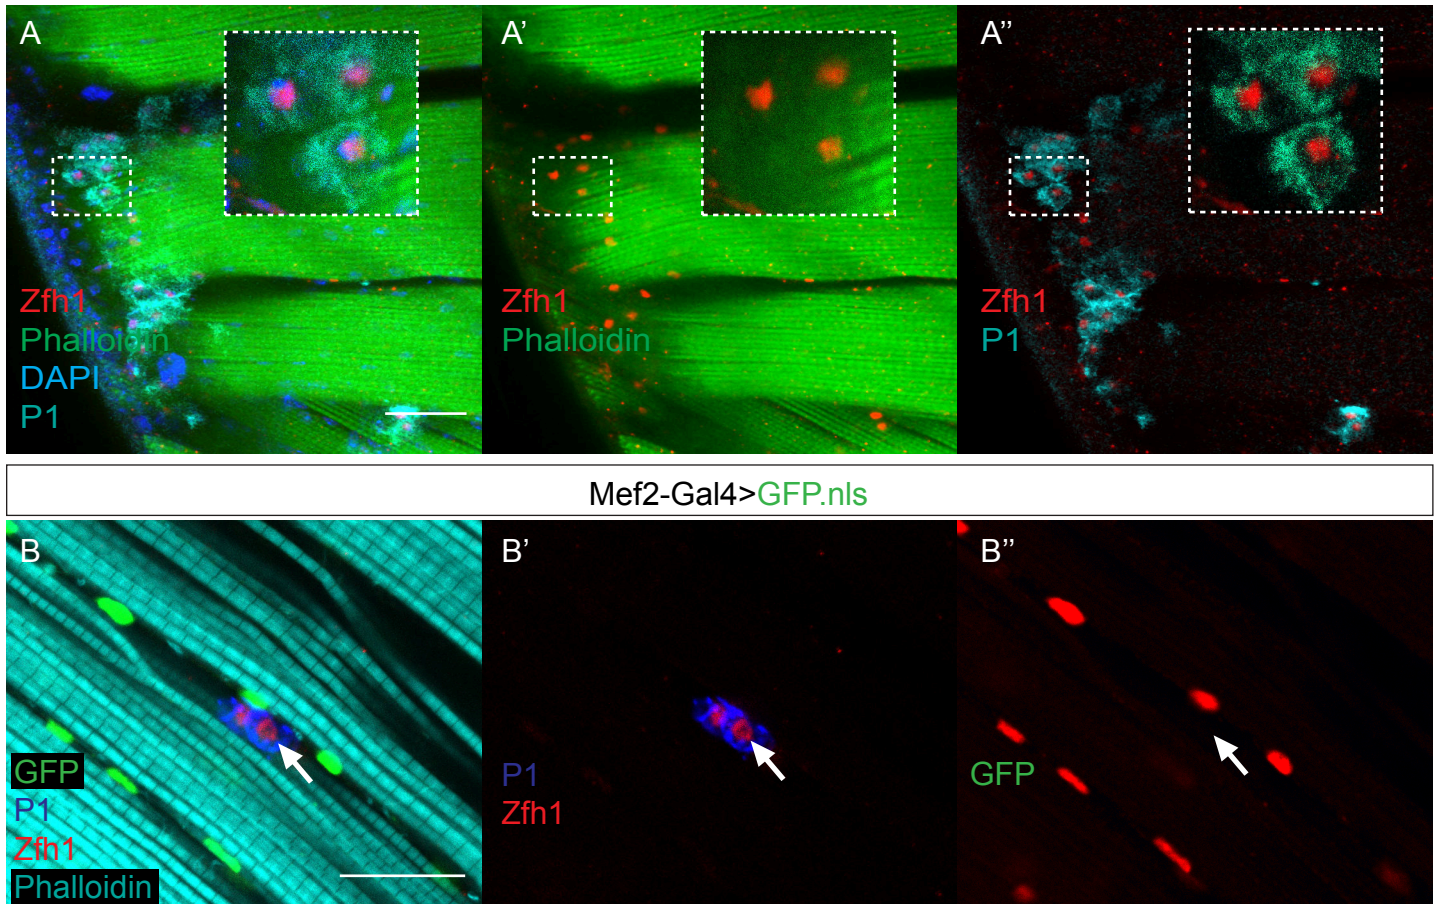

**Figure supplement 2. A-A''.** Wild type indirect flight muscles stained for P1 (Cyan), Zfh1 (Red), Phalloidin (Green) and DAPI (Blue). P1 expression indicates the presence of phagocytic immune cells, which are also positive for Zfh1. Insets: boxed regions magnified 4X. Scale bar: 50  $\mu$ M. **B-B''.** Indirect flight muscles from flies expressing *Mef2-Gal4>UAS-GFPnls* stained for GFP (Green), P1 (Blue), Zfh1 (Red) and Phalloidin (Cyan). The Zfh1 immune cells detected in the IFMs lack Mef2 expression (Arrows B-B''). Scale bar: 25  $\mu$ M.

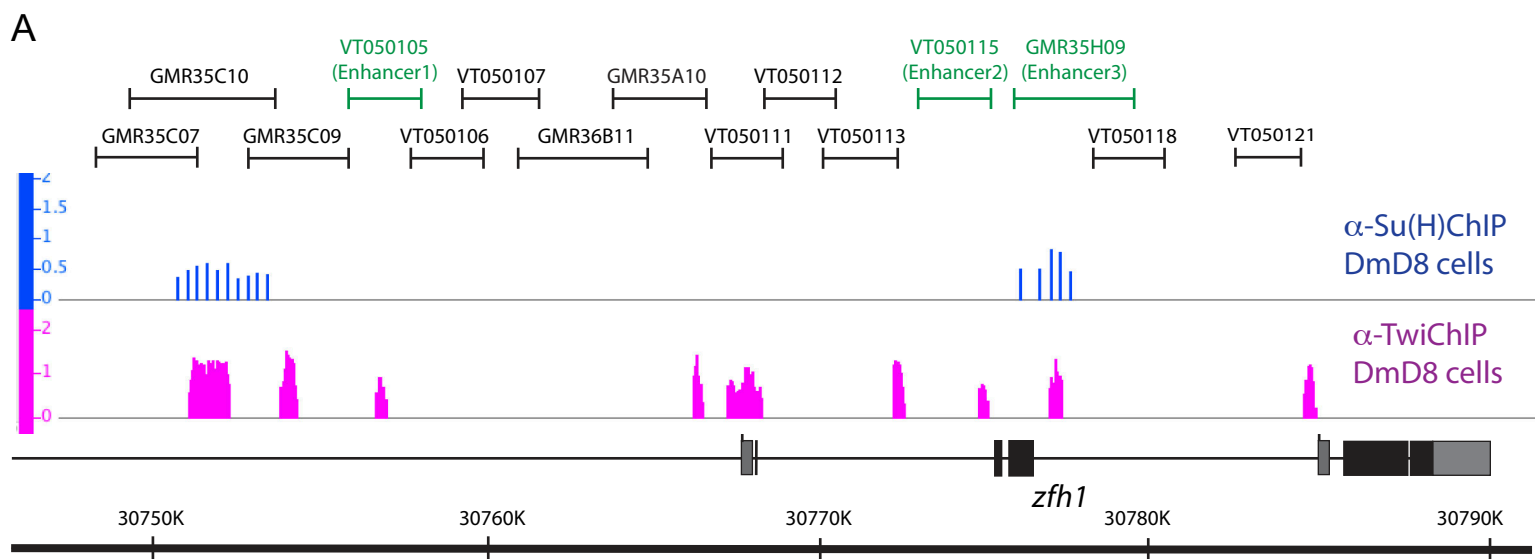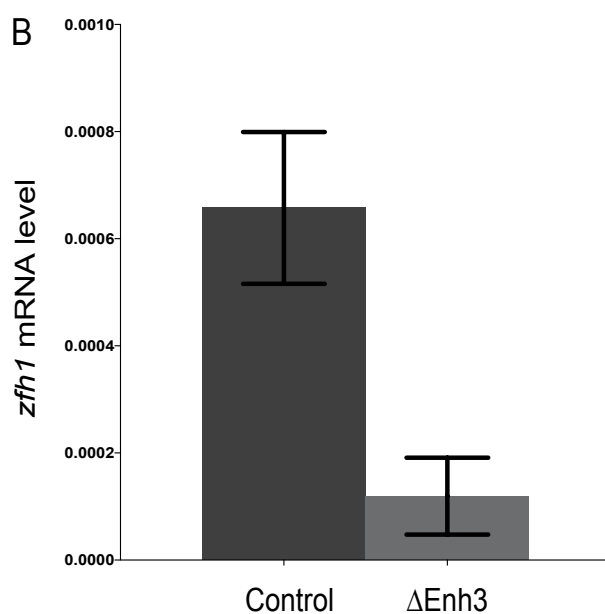

**Figure supplement 3. A.** Identification of active *zfh1* enhancers in MPs and pMPs. Chromosome 3R: 30,765,926-30,789,202 showing the *zfh1* genomic region with coding exons and untranslated regions represented in black and grey boxes, respectively. Arrows represent the transcription starts. Su(H) and Twi Chip enriched regions in DmD8 cells are represented in Blue and Magenta, respectively (Data from Bernard et al., 2010 (Chip Twi) and Krejci et al., 2009 (Chip Su(H))). Black lines represent all GMR and VT lines tested in our study. Green lines indicate the enhancers that are active in MPs *in vivo*. **B.** Effect of Enh3 Crisper deletion ( $\Delta$ Enh3) on *zfh1* mRNA level in larval MPs as determined by quantitative RT-PCR. *zfh1* mRNA level is significantly decreased by Enh3 deletion.

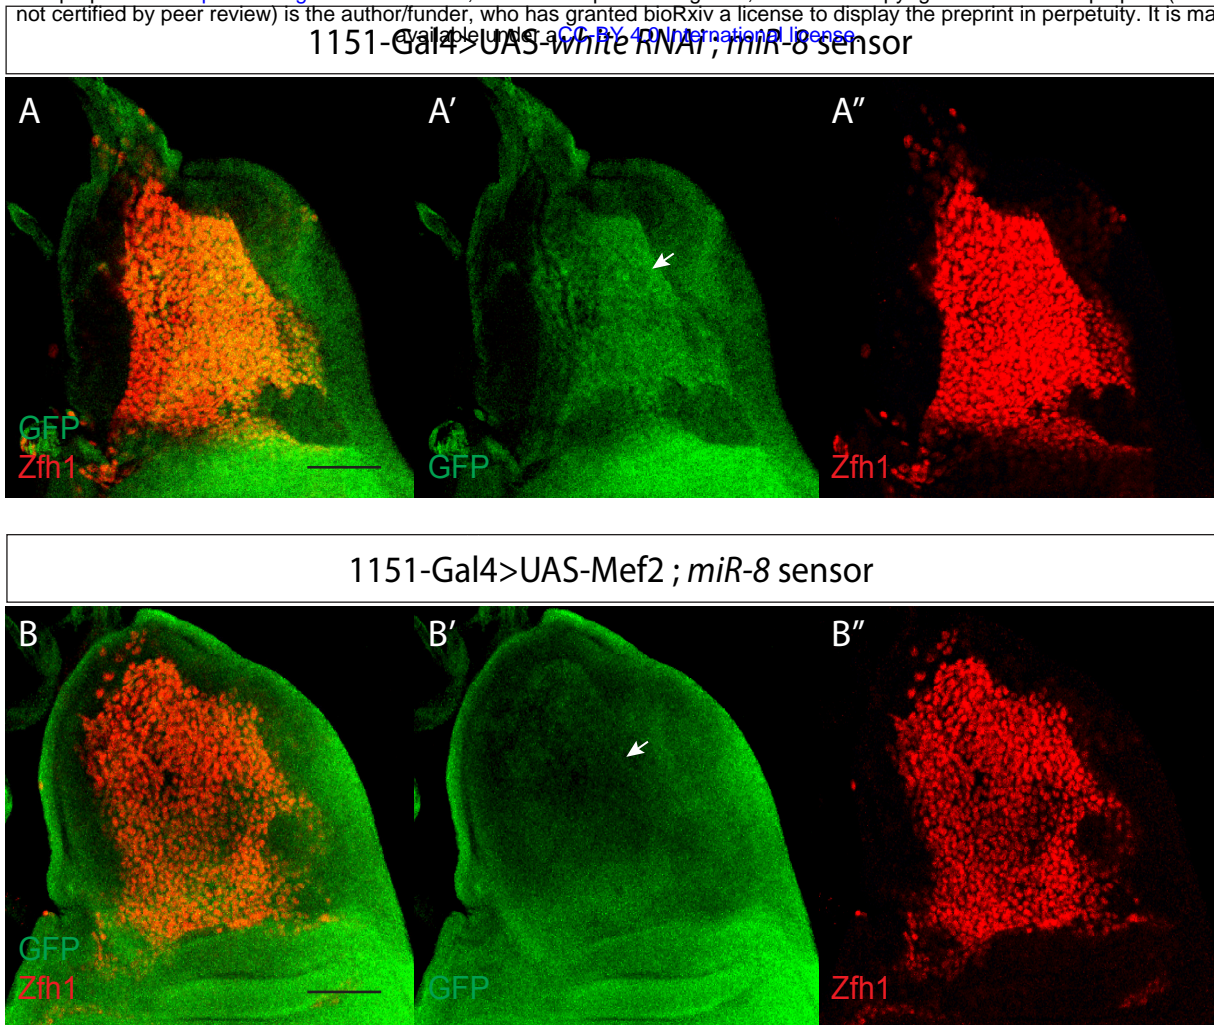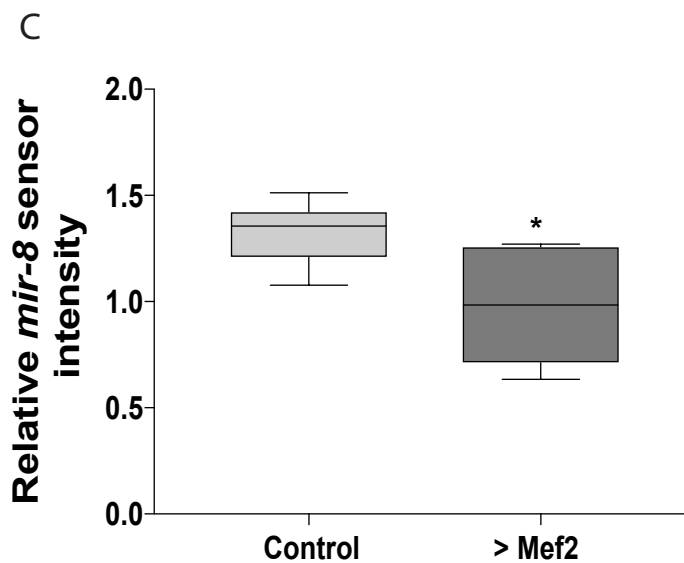

**Figure supplement 4. *miR-8* responds to high level of Mef2.** *miR-8* activity was detected using *miR-8-EGFP* sensor (Kennel et al., 2012). (A-B). Effect of Mef2 overexpression (1151-Gal4>UAS-Mef2) on *miR-8* sensor (Green) expression level in MPs. *miR-8* sensor expression in MPs is significantly reduced by Mef2 overexpression (Arrows in A' and B'). Zfh1 expression (Red) was used to visualise the MPs. (C). Quantification of *miR-8* Sensor intensity in the indicated conditions. (\*  $p = 0.0164$ ,  $n = 8$ ). Scale bars = 50  $\mu$ M.

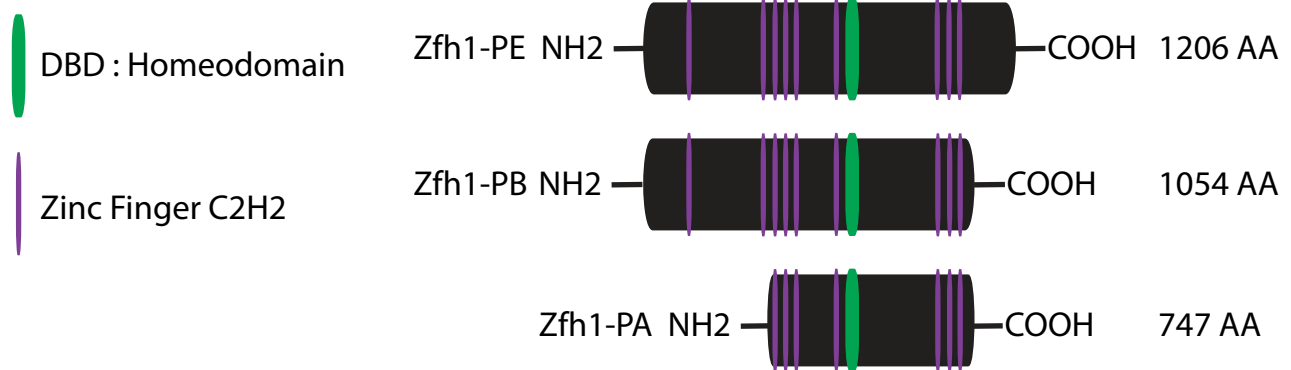

**Figure supplement 5.** Domain structure of *Drosophila* Zfh1 protein isoforms E, B and A. Magenta bars indicate the predicted zinc fingers, Green bar indicates the predicted homeodomain. All three protein-isoforms contain the core zinc finger and homeodomains needed for Zfh1 DNA-binding activity. Isoforms E and B contain two additional N-terminal zinc fingers (Postigo, et al., 1999).

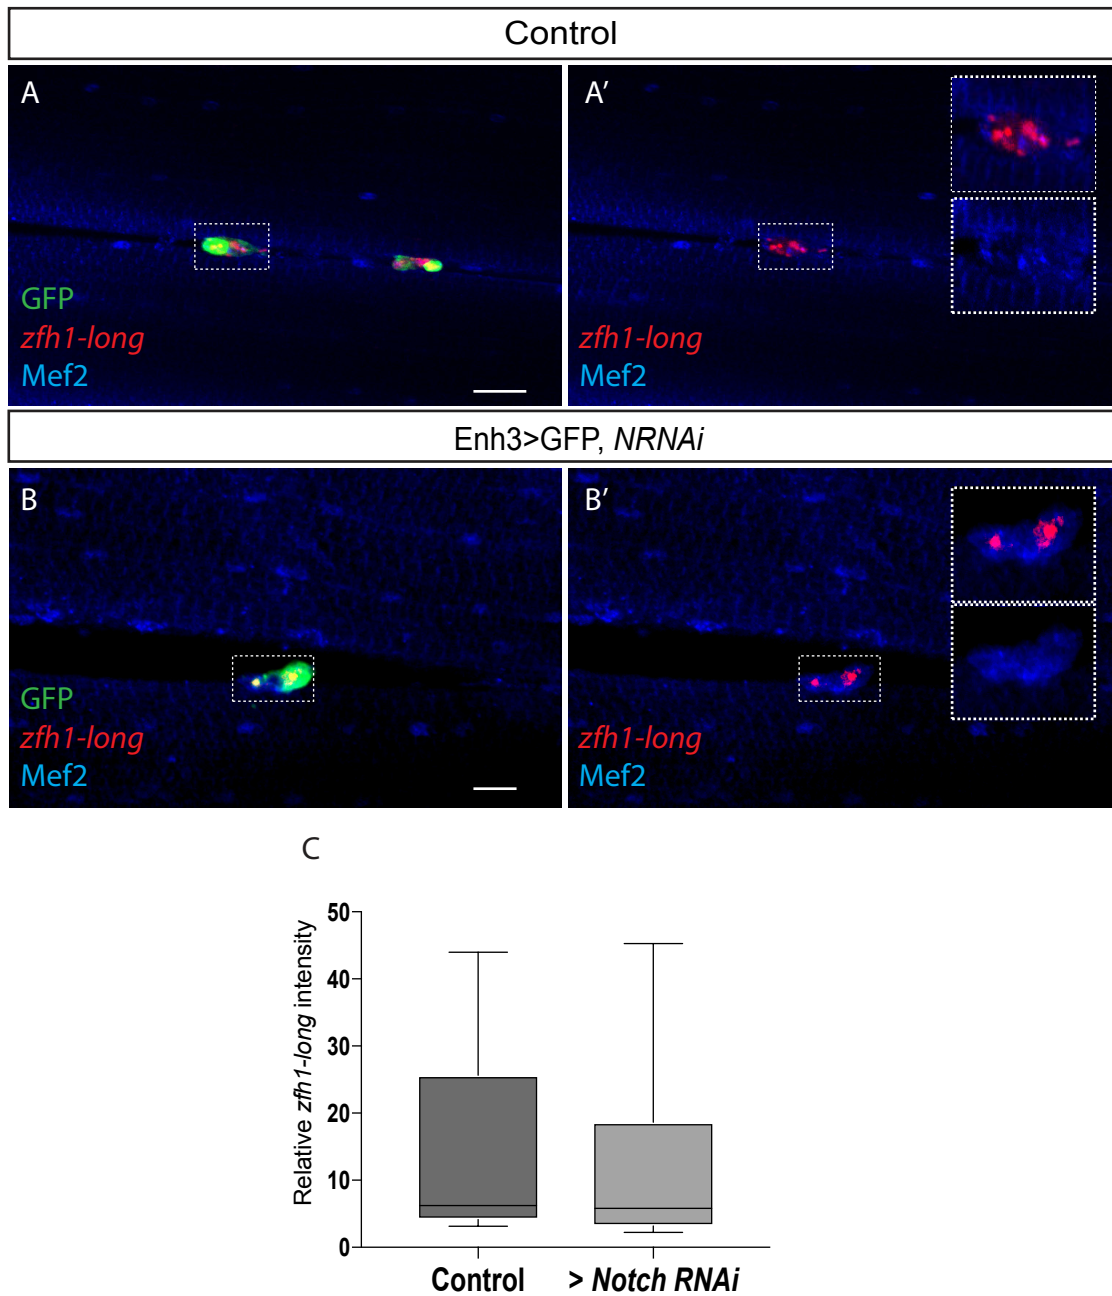

**Figure supplement 6.** Notch activity is not necessary for *zfh1-long* (red) transcription (A'-B' and C) in pMPs (green; *Enh3-Gal4>UAS-mCD8GFP*). *Enh3-Gal4* was used to drive expression of control RNAi (A-A'), *Notch* RNAi (B,B') specifically in pMPs. Mef2 (Blue) marks all muscle and pMP nuclei. Scale bars: 25  $\mu$ M. (C) Quantification of *zfh1-long* intensity in the indicated conditions, no significant difference was detected.
